1 **Deficient skeletal muscle regeneration after injury induced by a *Clostridium perfringens***  
2 **strain associated with gas gangrene**

3

4 **Ana Mariel Zúñiga-Pereira<sup>1</sup>, Carlos Santamaría<sup>2</sup>, José María Gutierrez<sup>1</sup>,**

5 **Alberto Alape-Girón<sup>1,3,\*</sup> and Marietta Flores-Díaz<sup>1</sup>**

6

7 <sup>1</sup> Instituto Clodomiro Picado, Facultad de Microbiología, Universidad de Costa Rica, San José, Costa Rica

8 <sup>2</sup> Laboratorio de Biología Molecular, Hospital Nacional de Niños, San José, Costa Rica

9 <sup>3</sup> Departamento de Bioquímica, Escuela de Medicina, Universidad de Costa Rica, San José, Costa Rica

10 \* [alberto.alape@ucr.ac.cr](mailto:alberto.alape@ucr.ac.cr)

11

12 **Key words:** Muscle fibers, Muscle cells, Muscle regeneration, Mouse models, *Clostridium perfringens*

13

14 **Data Availability statement:** All relevant data are within the paper.

15

16 **Funding:** This study was funded by Vicerrectoría de Investigación, Universidad de Costa Rica (Project No  
17 741-B8-135 to MF-D). The funder had no role in study design, data collection, and analysis, decisión to  
18 publish, or preparation of the manuscript.

19

20 **Competing interest:** The authors have declared that no competing interests exist.

21

22 **Author contributions:** Conceptualized, supervised and obtained funds for the project: MF-D; Conceived  
23 and designed experiments: MF-D, AA-G, AMZ-P, CS; Conducted experiments: AMZ-P, MF-D, CS;  
24 Analyzed data: MF-D, AA-G, AMZ-P, CS, JMG. Wrote the paper: MF-D, AA-G, AMZ-P; Edited the  
25 paper: MF-D, AA-G, AMZ-P, CS, JMG.

26 **Abstract**

27

28 Very little is known about the muscle regeneration process that follows myonecrosis induced by *C.*  
29 *perfringens*, the main agent of gas gangrene. This study revealed that, in a murine model of the infection with  
30 a sublethal inoculum of *C. perfringens*, muscle necrosis occurs concomitantly with significant vascular  
31 damage, which limits the migration of inflammatory cells. A significant increase in cytokines that promote  
32 inflammation explains the presence of inflammatory infiltrate; however, an impaired IFN $\gamma$  expression, a  
33 reduced number of M1 macrophages, a deficient phagocytic activity, and the prolongation of the permanence  
34 of inflammatory cells, lead to deficient muscle regeneration. The expression of TGF $\beta$ 1 and the consequent  
35 accumulation of collagen in the muscle, likely contribute to the fibrosis observed 30 days after infection.  
36 These results provide new information on the pathogenesis of gas gangrene caused by *C. perfringens*, shed  
37 light on the basis of the poor muscle regenerative activity, and may open new perspectives for the  
38 development of novel therapies for patients suffering this disease.

## 39 **Introduction**

40

41 Muscle regeneration after myonecrosis occurs in three sequential and interrelated phases: inflammation,  
42 regeneration, and remodeling (Carosio et al., 2011). Initially, cellular damage is associated with the entry of  
43 extracellular calcium that induces a series of degenerative events, including hypercontraction, mitochondrial  
44 alterations and the activation of calcium-dependent proteases, leading to necrosis of the myofibers (Carosio  
45 et al., 2011; Turner and Badylak, 2012). Moreover, the disruption of the sarcolemma results in an increase in  
46 serum levels of creatine kinase (CK), a protein normally restricted to the myofiber cytosol (Karalaki et al.,  
47 2009). The presence of necrotic fibers activates the inflammatory response and then an influx of specific cells  
48 of the immune system occurs in the damaged muscle (Carosio et al., 2011). Inflammation is a critical  
49 component of the regenerative process (Carosio et al., 2011). Injured muscle fibers activate the synthesis and  
50 release of a plethora of signaling molecules into the extracellular space, and these mediators induce the  
51 sequential attraction and activation of diverse cell populations that promote muscle regeneration (Tidball,  
52 2011; Karalaki et al., 2009). The vascular network has an important role in skeletal muscle regeneration as it  
53 has an impact on the distribution of recruited inflammatory cells, regeneration-related factors (growth factors,  
54 cytokines, chemokines), as well as nutrients. Therefore alterations in vascular integrity can affect the  
55 regenerative process (Gutiérrez et al., 2018).

56

57 Muscle regeneration begins with the activation of satellite cells (SC) that reside on the surface of muscle  
58 fibers (Tidball, 2017). Following muscle damage, some SC proliferate and differentiate whereas others return  
59 to quiescence as reserve population of myogenic cells (Tidball, 2017). Postmitotic precursor cells derived  
60 from activated SC then form multinucleated myotubes and proceed through a stage of regeneration that is  
61 dominated by terminal differentiation and growth (Tidball, 2017). When the formation of contractile muscle  
62 fibers is complete, the size of the newly formed myofibers increases and the nucleus is displaced to the  
63 periphery of the fiber (Karalaki et al., 2009).

---

64 Remodeling is a process in which the maturation and functional performance of regenerated myofibers occurs  
65 (Carosio et al., 2011). The final phase of the regenerative process is characterized by the remodeling of  
66 connective tissue, angiogenesis, and functional recovery of injured skeletal muscle (Carosio et al., 2011).  
67 After muscle injury, the extracellular matrix is remodeled, resulting in the overproduction of several types of  
68 collagen that contribute to the formation of a scar (Carosio et al., 2011); however, the overproduction of  
69 collagens within the damaged area could lead to excessive scarring and loss of muscle function (Carosio et  
70 al., 2011). The transforming growth factor  $\beta$ 1 (TGF $\beta$ 1) has been identified as a key factor in the activation  
71 of the fibrosis cascade in injured skeletal muscle (Carosio et al., 2011). The processes of neovascularization  
72 and reinnervation play a critical role in determining the regeneration potential of the injured muscle (Turner  
73 and Badylak, 2012).

74  
75 The influx of inflammatory cells to the site of muscle damage is paramount for efficient regeneration  
76 (Chazaud et al., 2003). The inflammatory response during the early stages of muscle regeneration is  
77 temporally and spatially coupled to the initial stages of myogenesis, when SC are activated and initiate their  
78 proliferation and differentiation (Tidball, 2017). Polymorphonuclear leucocytes (PMN) (Ly6C<sup>+</sup>) are the first  
79 inflammatory cells to invade the damaged muscle. The intramuscular density of these cells increases on the  
80 first six hours after the muscular damage, reaching a peak 24 h after the injury and then gradually returning  
81 to normal (Karalaki et al., 2009; Tidball, 2011; Tidball, 2017). PMN are essential for microbicidal action and  
82 for attracting other leucocytes capable of resolving inflammation and mediating the regeneration process (De  
83 Filippo et al., 2008). Resident tissue macrophages (F4/80<sup>+</sup>, LY6C<sup>+</sup>) promote a marked flow of PMN through  
84 the release of the main chemoattractants for the recruitment of PMN, such as the murine chemokine  
85 keratinocyte chemo attractant (KC or CXCL1) and macrophage inflammatory protein 2 (MIP2 or CXCL2).  
86 PMN initiate the process of removal of necrotic myofibers and cellular debris by phagocytosis and by the  
87 rapid release of high concentrations of free radicals and proteases (Turner and Badylack, 2012; Carosio et  
88 al., 2011). In addition, PMN secrete proinflammatory cytokines that stimulate the arrival of macrophages,  
89 further promoting tissue inflammation (Turner and Badylack, 2012; Carosio et al., 2011).

---

90 Two distinct populations of macrophages sequentially invade the damaged muscle tissue. A population of  
91 phagocytic macrophages CD68<sup>+</sup>/CD163<sup>+</sup>/F4/80<sup>+</sup> (M1 macrophages) closely follow the invasion of PMN,  
92 reaching their maximum concentration approximately two days after the injury, and subsequently decreasing  
93 in number (Tidball, 2011). The Th1 response is characterized by the presence of interleukin-1 (IL1 $\beta$ ),  
94 interleukin-2 (IL2), interferon- $\gamma$  (IFN $\gamma$ ) and tumor necrosis factor alpha (TNF $\alpha$ ) (Tidball, 2008). In turn, the  
95 M1 macrophages that produce TNF $\alpha$  and IL1 $\beta$  are capable of damaging the host tissue by releasing oxygen  
96 -free radicals that can damage cell membranes, phagocytose the necrotic muscle and promote the proliferation  
97 of SCs (Carosio et al., 2011; Turner and Badylack, 2012). The Th2 response involves high levels of  
98 interleukin-4 (IL4), interleukin-5 (IL5), interleukin-6 (IL6), interleukin-10 (IL10) and interleukin-13 (IL13),  
99 which have anti-inflammatory effects and deactivate M1 macrophages (Tidball, 2008). Additionally, IL4,  
100 IL10, and IL13 play well-characterized roles in the activation of non-phagocytic macrophages (Tidball, 2008;  
101 Tidball and Villalta, 2010). The non-phagocytic macrophages CD68<sup>+</sup>/CD163<sup>+</sup>/F480<sup>+</sup>/206<sup>+</sup>, known as M2  
102 macrophages, invade the muscle and reach their maximum peak approximately four days after injury, but  
103 the number of these cells remains elevated in the damaged muscle by periods of up to two weeks (Tidball,  
104 2011). M2 macrophages express high levels of IL10 and low levels of IL12 (Carosio et al., 2011). These  
105 tissue-remodeling macrophages decrease the inflammatory response and promote angiogenesis, as well as  
106 myoblast proliferation, growth, and differentiation (Carosio et al., 2011; Turner and Badylack, 2012).

107  
108 Stimulation by IFN $\gamma$  is essential for the classic activation of the Th1 phenotype (Tidball, 2008). IFN $\gamma$  is also  
109 a powerful activator of PMN and M1 macrophages (Tidball, 2017). Although IFN $\gamma$  is usually a product of  
110 "natural killer" cells and T cells, it could also be expressed by M1 macrophages having an autocrine role in  
111 their activation (Tidball, 2011; Tidball, 2017). Furthermore, the stimulation of IFN $\gamma$  can increase the response  
112 of PMN to chemotactic cytokines, potentially increasing their invasion to the sites of injury (Tidball, 2011).  
113  
114 TNF $\alpha$  is another Th1 cytokine highly expressed by M1 macrophages. TNF $\alpha$  in the muscle reaches its peak  
115 approximately 24 h after the onset of damage, which coincides with the invasion of PMN and M1

116 macrophages, and with the increase in secondary muscle damage generated by myeloid cells (Tidball, 2011).  
117 Part of myeloid cell-mediated damage to muscle fibers is caused by nitric oxide (NO) derived from inducible  
118 nitric oxide synthase (iNOS) and TNF $\alpha$  can stimulate M1 macrophages to elevate iNOS expression and thus  
119 promote further damage to muscle fibers (Tidball, 2011). The potential of TNF $\alpha$  to promote muscle repair  
120 and regeneration lies in its direct action on muscle cells (Tidball, 2017).

121  
122 Another important factor that influences the muscle regeneration process is TGF $\beta$ 1, which has been  
123 recognized as a modulator of myoblast activity (Chargé and Rudnicki, 2004). In general, TGF $\beta$ 1 plays a  
124 negative role in the regulation of myogenesis; it is highly expressed in quiescent SC and represses the progress  
125 of the cell cycle in these cells repressing the expression of MyoD and myogenin. (Fu et al., 2015).

126  
127 Gas gangrene induced by *Clostridium perfringens* is an acute and life threatening infection associated either  
128 to trauma or surgery and is characterized by fever, sudden onset of prominent pain, the accumulation of gas  
129 at the site of infection, massive local edema and a severe myonecrosis (Stevens and Bryant, 2017). When  
130 there is an anaerobic environment adequate for clostridial growth after the introduction of *C. perfringens* in  
131 a deep lesion or in a surgical wound, bacteria begin to multiply and the destruction of the muscle spreads  
132 within few hours (Stevens and Bryant, 2017). In mice, intramuscular injection of 10<sup>6</sup> wild type *C. perfringens*  
133 vegetative cells leads to a limited sublethal infection characterized by swelling and myonecrosis. In this work  
134 this model was used to characterize the regeneration process after skeletal muscle damage induced by this  
135 bacterium.

---

136

137 **Materials and Methods**

138

139 **Bacterial culture**

140

141 *C. perfringens* (strain JIR325) was grown on Brain Heart Infusion (BHI) broth in an anaerobic chamber until  
142 an OD<sub>600</sub> of 0.47 was reached. The number of colony forming units (CFU) per 100 µl was determined by  
143 plating serial 10-fold dilutions on BHI agar plates supplemented with yolk.

144

145 **Experimental infection**

146

147 CD-1 mice of 18-20 g body weight were injected in the left gastrocnemius with 1x10<sup>6</sup> CFU of *C. perfringens*  
148 JIR325, in 100 µl of 0.12 M NaCl, 0.04 M phosphates, pH 7.2 (PBS). All the procedures involving the use  
149 of animals in this study were approved by the Institutional Committee for the Care and Use of Laboratory  
150 Animals (CICUA) of Universidad de Costa Rica (approval number CICUA-098-17), and meet the Animal  
151 Research Reporting in vivo Experiments (ARRIVE) guidelines, and the International Guiding Principles for  
152 Biomedical Research Involving Animals of the Council of International Organizations of Medical Sciences  
153 (CIOMS).

154

155 **CK activity assay**

156

157 To evaluate myotoxicity, blood samples were collected 5 and 24 h post infection, and the CK activity in  
158 plasma was determined using the “CK-NAC UV Unitest” (Wiener Lab, Argentina) according to the  
159 manufacturer’s instructions.

160

161 **Histological analysis**

162

163 For histological analysis, groups of 3 mice were injected with  $1 \times 10^6$  CFU of *C. perfringens* JIR325 or with  
164 sterile PBS. Animals were sacrificed in the phase of muscle damage at 1, 5, and 24 h post infection, and in  
165 times that cover the various steps in the process of muscle regeneration, i.e., 3, 5, 7, 14 and 30 d post infection.  
166 The injected gastrocnemius muscles were dissected out and placed in a zinc fixative solution (calcium acetate  
167 3 mM, zinc acetate 27 mM, zinc chloride 36 mM, Tris buffer 0.1 M, pH 7.4), for at least 48 h at 4°C. The  
168 dissected muscles were dehydrated in ethanol, placed in xylene, and embedded in paraffin. Three non-  
169 consecutive sections of 4  $\mu$ m were obtained from the mid region of each muscle and placed in glass slides.  
170 Sections were deparaffinated in xylene, hydrated in distilled water and stained with hematoxylin and eosin.  
171 The microscopic evaluation was performed in an OLYMPUS BX51 microscope. Images of total muscle were  
172 captured from each section using an Evolution MP camera (Media Cybernetics, USA) and analyzed using  
173 the image analysis software Image Pro 6.3 (Media Cybernetics, USA). The necrotic area was estimated in  
174 samples collected 24 h post infection, considering the percentage of the area observed corresponding to  
175 damage and hypercontracted fibers. Areas of regeneration and of lack of regeneration were estimated in  
176 samples collected 14, and 30 d post infection; areas of regeneration corresponded to the percentage of the  
177 examined area characterized by the presence of regenerating fibers (fibers with centrally located nuclei),  
178 while non-regenerative areas were defined as the percentage of the examined area corresponding to cell debris  
179 and fibrotic muscle, while The diameters of regenerating fibers were determined in sections of muscles  
180 collected 30 d post infection.

181

## 182 **Collagen Staining**

183

184 Groups of 3 mice were injected with *C. perfringens* JIR325 or with sterile PBS, and sacrificed 7, 14, and 30  
185 d post infection. Increments of collagen in the muscle were detected by staining with Direct Red 80 (Sigma-  
186 Aldrich, USA) (0.1% in a saturated picric acid solution) which stains collagen, and Fast Green FCF 0.1%  
187 (Sigma-Aldrich, USA), which stains other proteins, for one h at room temperature, according with the  
188 procedure described by Hernández *et al.* (2011). Slides were washed with acidified water (5 mL of glacial



189 acetic acid per liter), dehydrated, and cleared in xylene. Microscopic evaluation was performed in an  
190 OLYMPUS BX51 microscope. Images of total muscle were captured from each section using an Evolution  
191 MP camera (Media Cybernetics, USA) and analyzed using the image analysis software Image Pro 6.3 (Media  
192 Cybernetics, USA). The percentage of fibrosis (collagen deposition) in total muscle was quantified 30 d post  
193 infection, using the image analysis software ImageJ 1.51K (National Institutes of Health, USA).

194

### 195 **Quantitative PCR**

196

197 Relative expression of transcripts coding for IL1 $\beta$ , IL6, TNF $\alpha$ , INF $\gamma$ , TGF $\beta$ 1, IL13, IL10, MIP2, KC and  
198 MCP-1 was determined in a similar schedule as reported in other muscle injuries models (Tidball, 2008,  
199 Tidball, 2011, Tidball, 2017). Groups of 6 mice were injected with *C. perfringens* JIR325 or with sterile PBS  
200 in the left gastrocnemius, and sacrificed 6 h, 1, 2, 3 and 6 d post-infection. The left gastrocnemius muscles  
201 were rapidly dissected out and ground under sterile conditions. Total RNA was extracted using  
202 TRIzol® Reagent (ambion, Invitrogen), according to the manufacturer's instructions and quantified using a  
203 NanoDrop 2000c Spectrophotometer (Thermo Scientific, USA) RNA was retrotranscribed to cDNA with  
204 RevertAid H Minus First Strand cDNA Synthesis Kit (Fermentas, Thermo Fisher Scientific) in a 2720  
205 Thermal Cycler (Applied Biosystems) using 4  $\mu$ g of total RNA and random hexamers primers. 160 ng of  
206 cDNA were used for each reaction in the quantitative real-time PCR (qPCR) using LightCycler® 480 SYBR  
207 Green I Master (Roche Diagnostics) and LightCycler® 480 real-time PCR device (Roche Diagnostics). The  
208 selected primers to assess inflammatory-response-specific genes PCR are listed in Table 1. Genes used as  
209 reference genes were the housekeeping genes glyceraldehyde-3-phosphate dehydrogenase (GAPDH), RNA-  
210 binding protein S1 (RNSP1) and the ribosomal protein L13A (RPL13A) (Piller et al., 2013). The cycle  
211 number at which the reaction crossed an arbitrarily placed threshold (Ct) was determined, and the relative  
212 expression of each gene regarding the mean expression of control genes was described using the equation 2-  
213  $\Delta\Delta C_t$  where  $\Delta C_t = C_{t\text{gene}} - C_{t\text{control genes (mean)}}$  and  $\Delta\Delta C_t = \Delta C_{t\text{mice} + C. \text{perfringens}} - \Delta C_{t\text{control mice}}$

214 (mean) (Livak and Schmittgen, 2001). Left gastrocnemius muscles of healthy mice injected with sterile PBS  
215 were used as controls.

216

## 217 **ELISAs**

218

219 The IL1 $\beta$ , IL6, TNF $\alpha$ , INF $\gamma$ , TGF $\beta$ 1, IL4 and IL10 protein content in the muscle was determined by capture  
220 ELISA at times in which their expression had been reported in other muscle injuries (Tidball, 2008, Tidball,  
221 2011, Tidball, 2017). Groups of 6 mice were injected intramuscularly in the left gastrocnemius with *C.*  
222 *perfringens* JIR325 or with sterile PBS. At various time intervals (6 h, 1, 2, 3 and 6 d), mice were killed and  
223 the injected gastrocnemius were dissected out, frozen with liquid nitrogen and homogenized in a sterile  
224 pyrogen-free saline solution with Complete EDTA-free proteases inhibitor (Roche Diagnostics). Muscle  
225 homogenates were centrifuged and the supernatants were collected and stored at -70°C. IL1 $\beta$ , TNF $\alpha$ , INF $\gamma$ ,  
226 IL4 and IL10 were quantitated using ELISA kits of R&B Systems (USA), while IL6 and TGF $\beta$ 1 were  
227 quantitated using ELISA kits of eBioscience (San Diego, CA, USA), according to the manufacturer's  
228 instructions. Lef gastrocnemius muscles of healthy mice injected with sterile PBS were used as controls.

229

## 230 **Quantification of inflammatory cells**

231

232 In order to detect different inflammatory cells, groups of three mice were injected with of *C. perfringens*  
233 JIR325 or with sterile PBS (negative controls), and sacrificed during the acute (1, 3, 5, and 24 h post infection)  
234 and the chronic phase (3, 5, 7 and 14 d post infection). Injected muscles were dissected out and embedded in  
235 paraffin, as described previously. For each muscle, three non-consecutive sections of 4  $\mu$ m were obtained  
236 and were placed in positive charged glass slides, deparaffinated in xylene and hydrated. Fluorescence  
237 immunohistochemistry for PMN was performed using Anti-Neutrophil Elastase Rabbit pAb (Cat. No.  
238 481001; EMD Millipore); antigen retrieval was carried out by placing the slides in citrate buffer (pH 6) at  
239 50°C for 10 min and blockage steps were performed with Dako Cytomation Biotin Blocking System (Dako,

240 USA), as well as with Protein Block Serum-Free (Dako, Denmark), following the manufacturer's  
241 instructions. Sections were incubated overnight with anti-neutrophil elastase antibody (diluted 1:10) at 4°C  
242 in a wet chamber. Then, sections were washed with PBS and incubated with a Polyclonal Goat Anti-Rabbit  
243 Immunoglobulins/Biotinylated (Cat. No. E0432; Dako, Denmark) (diluted 1:200) for one h at room  
244 temperature. After washing with PBS, sections were incubated with a Streptavidin Alexa Fluor 488 (Cat. No.  
245 S11223; Invitrogen) (diluted 1:200) for 30 min at room temperature. Finally, nuclear staining was performed  
246 with bis benzimide Hoechst (Cat. No. 33258; Sigma, USA) in a final concentration of 0.5 µg/mL. For the M1  
247 macrophages immunohistochemical stain, the protocol was similar to the one used for PMN with the  
248 following modifications: antigen retrieval was carried out using 0.6 U/mL of Proteinase K (Fermentas,  
249 Thermo Fisher Scientific) for 5 min at room temperature and the primary antibody used was Rabbit  
250 Polyclonal Anti-iNOS (Cat. No. ab15323; Abcam, USA) (diluted 1:75). M2 macrophages were stained with  
251 a Goat Polyclonal Anti-Arginase Antibody (Cat. No. ab60176; Abcam, USA). Briefly, antigen retrieval was  
252 carried out using Proteinase K (Fermentas, Thermo Fisher Scientific), blockage step was performed with  
253 Protein Block Serum-Free (Dako, Denmark) for 10 min at room temperature and then, sections were  
254 incubated overnight with the primary antibody (diluted 1:50) at 4°C in a wet chamber. Donkey F(ab')<sub>2</sub> anti-  
255 goat IgG H&L (Alexa Fluor®488) preadsorbed (Cat. No. ab150137; Abcam, USA) (diluted 1:200) was used  
256 as a secondary antibody, sections were incubated for 1 h at room temperature and then nuclear staining was  
257 performed. All the samples were analyzed in a OLYMPUS BX51 microscope, images of the complete  
258 histologic sections were captured using an Evolution MP (Media Cybernetics, USA) camera and the number  
259 of cells per mm<sup>2</sup> of the muscle were determined with the Image Pro 6.3 software (Media Cybernetics, USA).

260

### 261 **Quantification of capillaries in muscle tissue**

262

263 Groups of three mice were injected with *C. perfringens* JIR325 or with sterile PBS (negative controls), and  
264 sacrificed at times covering the degenerative phase (6 and 24 h) and the regenerative phase (30 d). Injected  
265 muscles were dissected out and embedded in paraffin, as described previously. From the mid region of each

266 muscle, three non-consecutive sections of 4  $\mu\text{m}$  were obtained and placed in positive charged glass slides,  
267 and then sections were deparaffinated in xylene and hydrated. Fluorescence immunohistochemistry was  
268 carried out in order to detect capillary vessels. For antigen retrieval, Proteinase K (Fermentas, Thermo Fisher  
269 Scientific) was used for 5 min at room temperature and then, blockage steps were performed with  $\text{H}_2\text{O}_2$  (3%)  
270 for 30 min, Dako Cytomation Biotin Blocking System (Dako, USA) for 10 min each, and with Protein Block  
271 Serum-Free (Dako, Denmark) for 1 h. Sections were incubated overnight with purified anti-mouse Flk-1  
272 (IHC) (Cat. No. 555307; BD Pharmigen<sup>TM</sup>) (diluted 1:50) at 4°C in a wet chamber. Then, sections were  
273 washed with PBS and incubated with Polyclonal Goat Anti-Rabbit Immunoglobulins/Biotinylated (Cat. No.  
274 E0432; Dako, Denmark) (diluted 1:200) for 1 h at room temperature. In order to amplify the signal, the  
275 Biotin-XX Tyramide SuperBoost<sup>TM</sup>Kit (Invitrogen) was used according to manufacturer's instructions.  
276 Streptavidin Alexa Fluor 488 (Cat. No. S11223; Invitrogen) (diluted 1:300) was used as final fluorophore for  
277 30 min at room temperature. Nuclear staining was performed with bis BENZIMIDE Hoechst (Cat. No. 33258;  
278 Sigma, USA) in a final concentration of 0.5  $\mu\text{g}/\text{mL}$ . Capillary vessels were defined as round and hollow  
279 structures, localized in the periphery of muscle cells, and having a diameter of 12  $\mu\text{m}$  maximum. Samples  
280 were analyzed with an OLYMPUS BX51 microscope and images from the total area of each histologic  
281 section were captured using an Evolution MP (Media Cybernetics, USA). The number of capillary vessels  
282 was determined in total muscle sections and the ratio of capillary vessels/ $\text{mm}^2$  and capillary vessels/muscle  
283 fibers were calculated using the Image Pro 6.3 software (Media Cybernetics, USA).

284

### 285 **Quantification of nerves**

286

287 Groups of three mice were injected with *C. perfringens* JIR325 or with sterile PBS (negative controls) and  
288 sacrificed at 3 and 30 d post infection. Muscles were processed as described and embedded in paraffin. For  
289 each muscle, three non-consecutive sections of 4  $\mu\text{m}$  were obtained and placed in positive charged glass  
290 slides, then deparaffinized in xylene and hydrated. Antigen retrieval was performed using Proteinase K  
291 (Fermentas, Thermo Fisher Scientific) for 5 min at room temperature. For blockage steps, Dako Cytomation

292 Biotin Blocking System (Dako, USA) as well as with Protein Block Serum-Free (Dako, Denmark) were used  
293 following the manufacturer's instructions. Sections were incubated overnight with an Anti-200 kD  
294 Neurofilament Heavy Antibody-Neuronal Marker (Cat. No. ab8135; Abcam, USA) (diluted 1:1000) at 4°C  
295 in a wet chamber. Then, sections were washed with PBS and incubated with Polyclonal Goat Anti-Rabbit  
296 Immunoglobulins/Biotinylated (Cat. No. E0432; Dako, Denmark) (diluted 1:200) for one h at room  
297 temperature. After washing with PBS, sections were incubated with a Streptavidin Alexa Fluor 488 (Cat. No.  
298 S11223; Invitrogen) (diluted 1:200) for 30 min at room temperature. Finally, nuclear staining was performed  
299 with bis BENZIMIDE Hoechst (Cat. No. 33258; Sigma, USA) in a final concentration of 0.5 µg/mL. Images  
300 of the complete histologic sections were captured using an Evolution MP camera (Media Cybernetics, USA)  
301 in an OLYMPUS BX51 microscope. Structures between 50 and 8000 µm<sup>2</sup> were considered and the number  
302 of nerves per mm<sup>2</sup> and the number of axons per µm<sup>2</sup> were determined with the Image Pro 6.3 software (Media  
303 Cybernetics, USA).

304

### 305 **Statistical analysis**

306

307 Data were analyzed by the statistics softwares IBM®SPSS Statistics® and GraphPad Prism version 5.00 for  
308 Windows. CK, PCR-RT and ELISAs were analyzed using Kruskal Wallis test and Dunn test as posthoc  
309 analysis. For analysis related to muscle regeneration process, area, muscle fibers, capillary vessels and nerves  
310 quantification, and the Mann-Whitney U test was used.

311 **Results and Discussion**

312

313 **A sublethal inoculum of *C. perfringens* induces myonecrosis**

314

315 *C. perfringens* is an anaerobic bacterium that induces gas gangrene, a devastating disease characterized by  
316 severe myonecrosis. Gas gangrene often occurs when vegetative or bacterial spores infect traumatic or  
317 surgical wounds and proliferate. We have previously shown that an intramuscular inoculum of  $6 \times 10^8$   
318 CFU of *C. perfringens* induces myonecrosis, as evidenced by a rapid release of CK into the circulation  
319 (Monturiol-Gross, 2012). In this work, it was found that an inoculum of  $1 \times 10^6$  CFU of this bacterium also  
320 induces a significant increase in plasma CK 5 h after infection ( $p < 0.01$ ), although at 24h postinfection the  
321 plasma CK activity showed no significant difference compared to controls (Fig. 1A), indicating that the  
322 infection was controlled by the immune system and that the process of myonecrosis was limited in time.  
323 Histological analysis of the infected muscle showed areas of myonecrosis characterized by hyaline  
324 myofibrillar material and hypercontraction of myofibers since 5 h post infection (Fig. 1B). Bacterial  
325 aggregates were evident between the muscle fibers whereas the inflammatory infiltrate was distributed in a  
326 non-homogeneous way in the muscle, without accumulation of PMN inside the venules (Fig. 1B).  
327 Accordingly, it was previously reported that the inhibition of chemotaxis at the site of infection by *C.*  
328 *perfringens* depends on the size of the inoculum, and thus a sublethal inoculum does not effectively inhibit  
329 the inflammatory infiltrate into the infected muscle; moreover, the immune system is able to control the  
330 infection, inhibiting the establishment of the bacteria (O'Brien et al., 2007). Thus, our model of a sublethal  
331 inoculum of the bacteria allowed us to study the development of the muscle regenerative response.

332

333 **A sublethal inoculum of *C. perfringens* impairs the muscle regeneration process**

334

335 To characterize the process of muscle regeneration, a histological analysis of the infected muscles was  
336 performed 7 d post infection. At this time, the presence of regenerative myofibers, characterized by central

337 nuclei (Fig. 2), near or within a fibrous matrix, was observed. In addition, cellular detritus from necrotic  
338 fibers had not been removed despite the presence of an inflammatory infiltrate even at 14 and 30 d post  
339 infection (Fig. 2).

340  
341 Due to the presence of regenerative cells, cell debris and fibrotic areas, regeneration and necrosis areas were  
342 quantified at 14 and 30 d after muscle injury (Fig 3A). At 24 h post infection the area of myonecrosis was  
343  $48.33 \pm 6.5\%$  of the total area of the muscle (initial lesion); at 14 d the percentage area corresponding to non-  
344 regenerated muscle was  $22.12 \pm 4.5\%$ , while only  $27.9 \pm 5.3\%$  of the muscle (Fig. 3A) was occupied by  
345 regenerating muscle fibers, hence evidencing a deficient muscular regeneration process.

346  
347 Although a portion of the damaged muscle was regenerated, when determining the size of the regenerative  
348 fibers it was observed that it differs significantly from the size of the fibers in control muscles at 30 d (Fig.  
349 3B). While in the controls  $44.5 \pm 2.8\%$  of the fibers had a diameter between 30-39  $\mu\text{m}$ , in the muscles infected  
350 with *C. perfringens*  $48.1 \pm 5.4\%$  of the fibers had a diameter between 10-19  $\mu\text{m}$ . Moreover,  $5.0 \pm 2.4\%$  of the  
351 regenerative cells in the infected muscles corresponded to fibers with a small diameter between 1-9  $\mu\text{m}$ ,  
352 indicating poor regeneration (Fig. 3B).

353  
354 Another characteristic of poor regeneration is the replacement of muscle fibers by fibrous tissue. Specific  
355 stain for collagen fibers was made with Syrian Red. Red areas (indicative of collagen deposition) around  
356 small regenerative cells were evident 7 d post infection in the damaged muscle. These areas remained over  
357 time and showed greater intensity at 14 d and 30 d (Fig. 4A) after the muscle injury. When performing a  
358 quantitative analysis at 30 d, the control showed only  $3.1 \pm 0.5\%$  of collagenous material in the total area,  
359 while in the muscles infected with a sublethal inoculum of *C. perfringens*,  $23.5 \pm 5.6\%$  of the muscle  
360 corresponded to collagen deposition, which represents a significant difference between both groups ( $p < 0.05$ )  
361 (Fig. 4B). Thus, the poor muscle regenerative outcome in this model correlates with an increased collagen  
362 deposition, underscoring the substitution of muscle fibers by a fibrotic matrix.

363

364 **A sublethal inoculum of *C. perfringens* alters capillary vessels and nerves in the infected muscle**

365

366 To determine whether the infection with *C. perfringens* damages the vasculature, an immunostaining was  
367 performed with antibodies specific for the endothelial growth factor receptor Flk-1. At 6 h after the infection,  
368 a decrease in the number of capillary vessels was evident, and approximately 75% of the vessels were  
369 damaged 24 h after the infection with a sublethal inoculum of *C. perfringens* (Fig. 5A). The lack of capillary  
370 vessels was observed mainly in areas of myonecrosis 6 h and 1 d after the infection; in addition, the structures  
371 that showed a positive staining signal in these areas were smaller than those of the control samples,  
372 highlighting that they were probably non-functional capillary vessels or endothelial cell debris (Fig. 5A).

373

374 When the capillary vessels were quantified by area of tissue, the control showed an average of  $805.3 \pm 43.8$   
375 capillaries per  $\text{mm}^2$ , while in the muscles affected by *C. perfringens* the number decreased significantly to  
376  $201.3 \pm 51.5$  capillaries per  $\text{mm}^2$  at 6 h ( $p < 0.05$ ) and  $203 \pm 52.9$  capillaries per  $\text{mm}^2$  at 24 h post infection  
377 ( $p < 0.05$ ) (Fig. 5B). Similar results were obtained when reporting the ratio of capillaries per muscle fiber,  
378 while the control showed an average of  $1.14 \pm 0.13$  capillaries per muscle fiber, in the infected muscles the  
379 average significantly dropped to  $0.37 \pm 0.09$  at 6 h ( $p < 0.05$ ) and to  $0.30 \pm 0.05$  at 24 h post infection ( $p < 0.05$ )  
380 (Fig. 5C).

381

382 Despite the significant decrease in the density of capillary vessels in early times after infection, at 30 d there  
383 were no significant differences in the number of capillaries per area or muscle tissue when compared to the  
384 controls (Figs. 5B and 5C), and they were evident even in the fibrotic tissue (Fig. 5A), suggesting a  
385 revascularization process. However, it is likely that the early disruption of the microvascular network in the  
386 infected muscle affects the process of regeneration, since key steps in muscle regeneration requiring an intact  
387 vascular supply occur within the first hours after myonecrosis. Muscle healing is critically affected by the  
388 ischemia associated with a deficient blood supply (Kotwal and Chien 2017). The most critical consequence



389 of ischemia is a decrease in cellular energy supply (Kotwal and Chien 2017), as energy is required for every  
390 aspect of the wound-healing process such as protein synthesis, cell migration and proliferation, membrane  
391 transport, and growth factor production (Kotwal and Chien 2017). In these circumstances, the observed  
392 revascularization process may have occurred at a time when the muscle regenerative process had been already  
393 impaired.

394

395 Regarding the alteration of the nerves in the muscle, the antibody used against the neurofilament of the axons  
396 allowed their detection by immunofluorescence (Fig. 6A). A decreased number of nerves was observed 3 d  
397 after infection with *C. perfringens* ( $1.66 \pm 0.27$  nerves per  $\text{mm}^2$ ), when compared with the control ( $3.16 \pm$   
398  $0.11$  nerves per  $\text{mm}^2$ ) ( $p < 0.05$ ) (Fig. 6B). In addition, a decreased number of axons within the nerves was  
399 observed (Fig. 6A); while in the control muscle the average was  $17.03 \pm 1.28$  axons per  $1000 \mu\text{m}^2$ , in the  
400 affected muscles it decreased significantly to  $6.72 \pm 1.07$  axons per  $1000 \mu\text{m}^2$  ( $p < 0.05$ ) (Fig. 6C). Despite the  
401 damage observed 3 d post infection, when the samples were analyzed 30 d after muscle injury no significant  
402 differences were found in relation to the controls for the number of nerves per area nor for the number of  
403 axons per  $1000 \mu\text{m}^2$  (Fig. 6C). Hence, a reinnervation process ensued in the muscle after the initial damage.

404

405 **A sublethal inoculum of *C. perfringens* increases the expression of mediators of the inflammatory**  
406 **response and fibrosis in the infected muscle**

407

408 To evaluate the immune response after infection with  $1 \times 10^6$  CFU of *C. perfringens*, expression of pro-  
409 inflammatory cytokines (IL1 $\beta$ , IL6, TNF $\alpha$ , IFN $\gamma$ ) and anti-inflammatory cytokines (IL4, IL10, IL13) was  
410 determined by RT-PCR and ELISAs (Fig. 7). Furthermore, the expression of PMN (MIP2 and KC), and  
411 macrophage (MCP-1) chemoattractant cytokines was also analyzed (Fig. 8).

412

413 A significantly increased expression of mRNA for IL1 $\beta$  and IL6 was observed 6 h post infection when  
414 compared to controls, which lasted up to at least 48 h ( $p < 0.01$ ) (Fig. 7A). The expression of TNF $\alpha$  also

415 showed a significant increase from 6 h on ( $p < 0.05$ ) and remained elevated for at least 48 h post infection  
416 ( $p < 0.01$ ) (Fig. 7A). Furthermore, a significant increase in the expression of IL10 was observed in comparison  
417 to controls from 1d ( $p < 0.01$ ) up to 6 d ( $p < 0.05$ ), reaching a maximum peak 24 h after infection with the  
418 bacteria ( $p < 0.01$ ) (Fig. 7A). When immunoassays were carried out to quantify various cytokines in the  
419 muscle, confirmatory results were obtained since IL1 $\beta$  remained high for at least 48 h post infection, IL6  
420 increased significantly from 6 to 48 h post infection ( $p < 0.01$ ), reaching maximum level at 6 h, while the  
421 TNF $\alpha$  reached a maximum level 48 h post infection ( $p < 0.01$ ). In contrast, IFN $\gamma$  showed only a significant  
422 increase at transcriptional level 6 h post infection ( $p < 0.01$ ), but not at the protein level (data not shown).

423  
424 There was not a significant difference in the expression of IL4 between infected mice and controls, whereas  
425 for IL13, there was a significant difference only at 6 d post infection ( $p < 0.05$ ) (data not shown). On the other  
426 hand, IL10 showed a significant increase 2 d after infection ( $p < 0.05$ ) and the amount of protein remained  
427 slightly higher than controls until 6 d (Fig.7B).

428  
429 The chemokines MIP2 and KC showed a significant increase in expression in comparison with controls from  
430 6 h to 48 h post infection with a sublethal inoculum of *C. perfringens* ( $p < 0.01$ ) (Fig. 8). KC highest expression  
431 occurred 6 h post infection (maximum peak) and remained high even at 48 h. MCP-1 highest expression  
432 occurred 6 h post infection, although it decreased 24 h post infection and increased again at 48 h; its  
433 expression was significantly higher than that observed in the controls in all the evaluated times (Fig. 8).

434  
435 Because the TGF $\beta$ 1 has been associated with fibrosis in the process of muscle regeneration, its gene  
436 expression and protein concentration were analyzed. A bimodal behavior was shown for TGF  $\beta$ 1 both at the  
437 transcriptional and protein levels. When the relative mRNA expression was analyzed, a significant increase  
438 was observed one day after infection ( $p < 0.05$ ) in relation to the control, its expression decreased at 2 d but  
439 increased again at 3 d ( $p < 0.01$ ), remaining elevated at least until 6 d post infection ( $p < 0.05$ ) (Fig. 9A).

440

441 At the protein level, a significantly higher amount of TGF $\beta$ 1 was detected in the infected muscle when  
442 compared to the control 1 d after infection ( $p < 0.01$ ), and although there was a decrease at 3 d, the protein  
443 concentration remained elevated 6 d post infection in the infected muscles, as compared to the controls  
444 ( $p < 0.05$ ) (Fig. 9B). Thus the increase in TGF $\beta$ 1 correlates with the poor regeneration found after the infection  
445 with a sublethal dose of *C. perfringens*. This fits with the known role of this mediator which favors collagen  
446 deposition, i.e. fibrosis, and inhibits myogenic cell differentiation.

447

448 **A sublethal inoculum of *C. perfringens* alters the influx of PMN and macrophages to the infected muscle**

449

450 PMN are the first cells that reach the muscle after a myonecrosis, and are followed by M1 and M2  
451 macrophages before the resolution of muscle damage (Tidball, 2017). In injuries induced by a lethal inoculum  
452 of *C. perfringens*, the absence of inflammatory cells in the infected muscle and the presence of PMN attached  
453 to the endothelium due to the overexpression of adhesion molecules has been reported (Stevens and Bryant,  
454 2002). However, when using a sublethal inoculum of this bacterium, an inflammatory infiltrate was observed  
455 in the muscle, with the presence of PMN, both aggregated and dispersed in the necrotic muscle (Fig. 10A).  
456 The presence of PMN was evident 5 h after infection (Fig. 10A), when they reached a number of  $505.2 \pm 38$   
457 cells per  $\text{mm}^2$  (Fig. 10B). At 24 h their number was  $548.4 \pm 56.40$  cells per  $\text{mm}^2$ , at 3 d  $342.2 \pm 36.57$  cells  
458 per  $\text{mm}^2$ , and at 5 d after infection numbers dropped to  $81.68 \pm 9.87$  cells per  $\text{mm}^2$  (Figs. 10A and 10B).  
459 These observations agree with the described pattern of early neutrophil influx as the first wave of  
460 inflammatory cells in injured tissues.

461

462 M1 macrophages immunostained with anti-iNOS were poorly detected during the study period. Its density  
463 was  $106.3 \pm 23.18$  M1 cells per  $\text{mm}^2$  24 h post infection, reached maximum at 2-3 d post infection ( $142.60 \pm$   
464  $18.21$  cells per  $\text{mm}^2$ ) (Figs. 11A and 11B) and decline further until 5 d post infection ( $25.43 \pm 8.51$  cells per  
465  $\text{mm}^2$ ) (Fig. 11B). M2 macrophages immunostained with anti-arginase antibodies were detected 24 h post

466 infection and reached a maximum density 7 d post infection ( $616.2 \pm 179.4$  cells per  $\text{mm}^2$ ) (Figs. 11A and  
467 11B), although they were detected even 14 d post infection ( $41.82 \pm 18.06$  cells per  $\text{mm}^2$ ) (Fig. 11B).

468  
469 Little influx of M1 macrophages (iNOS<sup>+</sup>) in the muscle of the infected animals was evident (Figs. 11A and  
470 B), which suggests alterations in this population of inflammatory cells after infection with a sublethal  
471 inoculum of *C. perfringens*. This could be due to the observed absence of IFN- $\gamma$ . Accordingly, in experiments  
472 in which IFN $\gamma$  signaling has been blocked in injured muscles, there is a reduction in the expression in  
473 macrophages of transcripts that indicate the activation of the M1 phenotype, such as iNOS (Cheng et al.,  
474 2008). The classical inflammation response after a tissue injured occurs within the following 5 d (Novak and  
475 Koh, 2013). Normal remodeling in muscle is very dependent on the timing of the M1 and M2 macrophages  
476 response (Chazaud, 2016; Xiao et al., 2016). The transition to M2 macrophages is critical to muscle  
477 regeneration, and prolonged inflammation results in fibrosis (Chazaud, 2016; Xiao et al., 2016).

478  
479 IL10, IL4 and IL13 have defined roles in the activation of M2 macrophages, which constitute a complex  
480 population comprising several subpopulations with functional and molecular specializations (Mantovani et  
481 al., 2004; Tidball and Villalta, 2010). M2a macrophages are activated by IL4 and IL13, secrete IL10, express  
482 arginase 1, and promote wound healing and muscle regeneration, while M2b are activated by immune  
483 complexes or Toll-like receptors, and release anti-inflammatory cytokines associated with the Th2 response  
484 (Tidball and Villalta, 2010; Rigamonti, 2013). On the other hand, M2c macrophages are activated by IL10,  
485 release cytokines that deactivate the M1 phenotype, promote the proliferation of nonmyeloid cells, and  
486 influence the deposition of the extracellular matrix (Tidball and Villalta, 2010; Tidball, 2017). Hence, the  
487 dynamics of cytokine synthesis in the affected muscle greatly determines the appearance and action of various  
488 populations of macrophages in a complex tissue landscape which, in turn, greatly determines the outcome of  
489 the regenerative process. Macrophages play a central role in the natural wound healing (Juban and Chazaud,  
490 2017). They direct T-cell activation, promoting stem cell and progenitor cell migration, activating angiogenic  
491 responses, and guiding extracellular matrix remodeling (Castiglioni et al., 2015). They phagocytose cellular

492 debris generated during tissue remodeling, recycling important molecular components to be reused (Juban  
493 and Chazaud, 2017). The phenotype of the macrophages can have profound influences on the progression of  
494 disease or injury (Juban and Chazaud, 2017). The same macrophage can switch between pro-inflammatory  
495 and pro-healing states depending on the surrounding environmental cues, and the switch from the M1 to the  
496 M2 phenotype occurs in stages in response to upregulation of IL-4 and IL-13 (Juban and Chazaud, 2017).

497

498 Recruited monocytes fail to differentiate adequately in tissue remodeling, in muscular dystrophy (Villalta et  
499 al. 2009), insulin resistance (Olefsky and Glass 2010), and advanced age (Mahbub et al. 2012) leading to  
500 unsuccessful remodeling and tissue repair (Carvalho et al. 2013; Villalta et al. 2011a, b). Similar to muscular  
501 dystrophies, muscle loss due to aging is likely caused by a prolonged inflammatory response, characterized  
502 by a higher expression of IL-1 $\beta$ . If the M1 response lasts too long, the new tissue is highly fibrotic, leading  
503 to a decreased function. In myonecrosis induced by a sublethal inoculum of *C. perfringens* altered muscle  
504 regeneration was observed in association to both a delayed recruitment of macrophages at the site of infection  
505 and an altered production of cytokines.

506

507 After infection with a sublethal inoculum of *C. perfringens*, a significant increase in the gene expression level  
508 of IL10 in the muscle was observed from 1 d (maximum peak) to 6 d after infection, and at the protein level  
509 since 2 d (maximum peak) (Figs. 7A and B). Although no significant changes were detected in the expression  
510 of IL4, for IL13 an increase in gene expression level was observed after 6 d (data not shown). The influx of  
511 both M1 and M2 macrophages into the infected muscle was observed since the first day post infection. The  
512 presence of M1 macrophages in the infected muscle was scarce, having its maximum peak by 3 d whereas  
513 M2 macrophages were more abundant than M1 in the infected muscle, having its maximum peak by 7 d and  
514 remaining high even after 14 d (Fig. 11B). The altered arrival of M1 and M2 macrophages into the infected  
515 muscle after infection in our model is likely to alter the muscle regeneration process.

516

517 When analyzing the arrival and permanence of the different cell populations using a sublethal dose of *C.*  
518 *perfringens* vis-à-vis the typical inflammatory response reported in the literature (Fig. 12), there is a  
519 prolongation of the inflammatory response in the *C. perfringens* model. The PMN remain in the infected  
520 muscle up to 5 d, which is complemented with a high expression of proinflammatory cytokines for up to at  
521 least 2 d. In addition, there is a limited arrival of M1 macrophages which remain within the infected muscle  
522 for longer time span than expected. It is proposed that given the absence of IFN $\gamma$  in the acute phase of  
523 infection, the number and activity of M1 macrophages were affected. One possible explanation for this could  
524 be an altered function of PMN due to the direct effect of *C. perfringens* toxins in these cells. It has been  
525 reported that perfringolysin O (PFO) induces cytotoxicity in PMN (Stevens and Bryant, 2002) and, *C.*  
526 *perfringens* phospholipase C (CpPLC) interferes in the replacement of mature PMN in the peripheral  
527 circulation, inhibiting their maturation (Takehara et al., 2016). Additionally, the vascular damage caused by  
528 *C. perfringens* infection could also contribute to prevent the influx of cells of the inflammatory response.  
529 Thus, the direct and indirect effects of the infection with *C. perfringens* on inflammatory cells results in  
530 evident consequences in the regenerative response.

531  
532 After a muscle injury, the regeneration process is mediated by a specific type of stem cells, the SC, but also  
533 involves the interaction of these myogenic cells with other resident cells, inflammatory cells, blood vessels,  
534 nerves and the extracellular matrix (Ciciliot and Schiaffino, 2010; Hernández et al., 2011). There are at least  
535 three basic requirements for the process of muscle regeneration to occur: a) an adequate blood flow in the  
536 regenerative muscle; b) innervation of regenerative cells; and c) permanence of the basal lamina around the  
537 necrotic muscle fibers, which serves as a scaffold and substrate for regeneration (Gutiérrez et al., 2018).  
538 Impairment of any of these contributory factors results in a defective muscle regeneration.

539  
540 The importance of blood flow lies, on one hand, in the inflow of inflammatory infiltrate to the site of the  
541 lesion and, in addition, to the provision of oxygen and nutrients and ATP to the regenerating muscle. When  
542 vascular density was analyzed after an infection with a sublethal inoculum of *C. perfringens*, it was observed

543 that the microvasculature is affected in the first hours after infection, a time that coincides with the arrival of  
544 PMN, the first inflammatory cells present in the infected muscle. Although the presence of the inflammatory  
545 infiltrate is evident, the vascular damage and the direct effect of CpPLC and PFO on cells of the immune  
546 system can affect the migration of inflammatory cells to the area of damage, which results in the deficient  
547 removal of necrotic debris. Thus, the combination of a direct inhibitory action of *C. perfringens* toxins, added  
548 to the disruption of the microvascular network, is likely to affect the timely arrival of inflammatory cells. It  
549 has been reported that disturbances that affect the removal of dead cells delay the process of muscle  
550 regeneration (Tidball, 2017; Zhao et al., 2016). This may be due to the fact that the persistence of cellular  
551 debris becomes a physical obstacle for muscle regeneration.

552  
553 Another consequence of the damage to the vascular system in the regenerative process is the limitation in the  
554 available oxygen, which is critical for muscle healing. Hypoxia can also promote the proliferation of bacteria  
555 and the further development of gas gangrene, hence generating a vicious cycle (Flores-Diaz and Alape Girón,  
556 2003). In studies carried out with snake venoms, the alteration of the microvasculature affects the regenerative  
557 process, favoring the replacement of muscle by fibrotic muscle; moreover, regenerative fibers have small  
558 diameters (Gutiérrez et al., 1984; Arce et al., 1991; Hernández et al., 2011). Although our findings showed  
559 that the capillary density is restored at 30 d, it is possible that the severe blood vessel damage induced by *C.*  
560 *perfringens* in the first hours after infection (Fig. 5) could be one of the causes behind the impaired  
561 regenerative process.

562  
563 Innervation is another requirement for a successful muscle regeneration process. The proliferation and fusion  
564 of myogenic cells occur in muscles that regenerate in the absence of nerves and in those in which the nerves  
565 are intact (Slater and Schiaffino, 2008). However, although the initial events of the muscle regeneration  
566 process can occur in the absence of innervation, the latter is required for the growth and recovery of muscle  
567 function (Kalhovde et al., 2005; Slater and Schiaffino, 2008). In the absence of innervation, regenerating cells  
568 do not reach their maturity. In the model, although the density and structure of the nerves were affected with



569 a sublethal inoculum of *C. perfringens* 3 d after infection, innervation was recovered at 30 d (Fig. 6B).  
570 Consequently, innervation does not appear to be a cause of poor regeneration after muscle damage generated  
571 by *C. perfringens*. However, the question remains as to whether *C. perfringens* toxins induce damage at the  
572 synaptic level and neuromuscular transmission, as has been reported for the lethal toxin of *Clostridium*  
573 *sordelii* (Barbier et al., 2004). For a successful muscle regeneration process, scaffolding is required to  
574 maintain the position of the muscle fibers.

575

576 The processes of muscle necrosis and regeneration involve a complex turnover of the extracellular matrix,  
577 which is determinant for an effective regenerative response. The process of matrix deposition after  
578 myonecrosis, although initially beneficial, affects the regenerative process if it continues without control,  
579 resulting in the permanent accumulation of collagen around the myofibers, which may even lead to muscle  
580 replacement by fibrous tissue (Serrano and Muñoz-Cánoves, 2010). Fibroblasts contribute to the formation  
581 of fibrous muscle by the production and accumulation of components of the extracellular matrix, such as  
582 hyaluronic acid, fibronectin, proteoglycans and interstitial collagens (Serrano and Muñoz-Cánoves, 2010).  
583 When the histological sections of animals infected with a sublethal inoculum of *C. perfringens* were analyzed,  
584 it was observed that at 30 d, almost 25% of the muscle area corresponded to collagen accumulated in areas  
585 where the regenerative process was deficient (Fig. 4). This may be associated with the overexpression of  
586 some mitogenic chemokines and cytokines, produced by macrophages and PMN, which are also involved in  
587 the mechanism of fibrogenesis. It has been reported that MCP-1 is a profibrotic mediator, whose  
588 neutralization reduces the extent of fibrosis (Deshmane et al., 2009; Wynn, 2008).

589

590 Experimental models of fibrosis have documented potent antifibrotic properties for cytokines associated with  
591 the Th1 response such as IFN $\gamma$  (Wynn, 2008); thus, the absence of this cytokine in our study model could be  
592 associated with overproduction of extracellular matrix. On the other hand, IL10 and TGF $\beta$  activate a  
593 subpopulation of M2 macrophages that promotes the deposition of extracellular matrix and fibrosis in  
594 different pathogenic conditions (Serrano and Muñoz-Cánoves, 2010; Tidball, 2017). TGF $\beta$  has been



595 associated with the development of fibrosis in a number of diseases as it is one of the main activators of  
596 macrophages and fibroblasts; of the three isotypes of TGF $\beta$  in mammals, muscle fibrosis is mainly attributed  
597 to the TGF $\beta$ 1 isoform (Yoshimura et al.2010; Wynn, 2008). In this work an increase of TGF $\beta$ 1 was evidenced  
598 both in early and late time intervals (Fig. 9), and hence may be related to the collagen accumulation evidenced  
599 since 7 d.

600

601 IFN $\gamma$  has a relevant function in muscle regeneration, since this molecule directly regulates myogenic cells in  
602 their differentiation process (Cheng et al., 2008; Tidball et al., 2017). Therefore, the alterations in the  
603 regenerative response observed in this study could also be a consequence of the absence of IFN $\gamma$ . In general,  
604 infection with a sublethal inoculum of *C. perfringens* stimulates the expression of chemoattractants and  
605 cytokines that stimulate the arrival of different inflammatory cells at the site of the lesion. However, it has  
606 been previously reported that the bacterium generates toxins capable of directly affecting PMN and  
607 macrophages and, as a consequence, their function is altered. Additionally, the recruitment of M1  
608 macrophages to the site of infection was affected by the lack of IFN $\gamma$ . On the other hand, the bacterium  
609 generates damage at the level of the microvasculature and, as a consequence, affects the migration of the  
610 phagocytes into the damaged muscle. The alteration of the influx of the different inflammatory cells leads to  
611 a deficient cell debris removal of The above observations, coupled with the release of factors that stimulate  
612 the overproduction of collagen such as TGF $\beta$ 1, result in poor muscle regeneration, characterized by fibrosis  
613 and small regenerative fibers.

614

615 Although muscle regeneration is highly efficient in many clinical and experimental models, provided basic  
616 requirements are fulfilled, muscle regeneration after myonecrosis induced by a sublethal inoculum of *C.*  
617 *perfringens* is deficient probably due to altered events in the initial phases following injury, which are critical  
618 and influence the overall outcome of the regeneration process. The inflammatory response induced by *C.*  
619 *perfringens* is characterized by alterations in the early influx of inflammatory cells, mainly PMN,  
620 macrophages M1 and M2 to the site of infection. These cells remain in the muscle for prolonged periods of

621 time and are likely to be functionally impaired. In the case of M1 macrophages, their limited recruitment is  
622 possibly due to the low levels of  $\text{INF}\gamma$  produced. Our findings highlight several aspects of the regenerative  
623 muscle response which are affected in the experimental model of gas gangrene used. Understanding the  
624 mechanisms of the inflammatory and regenerative response in the muscle after infection by *C. perfringens*  
625 could be crucial for understanding the bases behind such poor regenerative response and for devising  
626 innovative therapeutic strategies for this drastic muscular pathology.

627

628       **References**

- 629
- 630   Arce, V., Brenes, F., Gutiérrez, J.M. Degenerative and regenerative changes in murine skeletal muscle after  
631       injection of venom from the snake *Bothrops asper*: a histochemical and immunocytochemical study. *Int.*  
632       *J. Exp. Pathol.* 1991. 72(2): 211–226.
- 633   Arnold, L., Henry, A., Poron, F., Baba-Amer, Y., van Rooijen, N., Plonquet, A., Gherardi, R., Chazaud, B.  
634       Inflammatory monocytes recruited after skeletal muscle injury switch into antiinflammatory macrophages  
635       to support myogenesis. *J. Exp. Med.* 2007. 204(5):1057-1069.
- 636   Barbier, J., Popoff, M., Molgó, J. Degeneration and regeneration of murine skeletal neuromuscular junctions  
637       after intramuscular injection with a sublethal dose of *Clostridium sordellii* lethal toxin. *Infect. Immun.*  
638       2004. 72(6):3120-3128.
- 639   Carosio, S., Berardinelli, M., Aucello, M., Musaró, A. Impact of ageing on muscle cell regeneration. *Ageing*  
640       *Res. Rev.* 2011. 10(1):35-42.
- 641   Carvalho SC, Apolinário LM, Matheus SM, Santo Neto H, Marques MJ. EPA protects against muscle damage  
642       in the mdx mouse model of Duchenne muscular dystrophy by promoting a shift from the M1 to M2  
643       macrophage phenotype. *J Neuroimmunol.* 2013. 264(1-2):41-7
- 644   Castiglioni A, Corna G, Rigamonti E Basso V, Vezzoli M, Monno A, Almada AE, Mondino A, Wagers  
645       AJ, Manfredi AA, Rovere-Querini P FOXP3+ T Cells Recruited to Sites of Sterile Skeletal Muscle Injury  
646       Regulate the Fate of Satellite Cells and Guide Effective Tissue Regeneration. *PLoS One.* 2015.  
647       3;10(6):e0128094.
- 648   Chargé, S., Rudnicki, M. Cellular and molecular regulation of muscle regeneration. *Physiol. Rev.* 2004.  
649       84(1):209-238.
- 650   Chazaud B, Sonnet C, Lafuste P, Bassez G, Rimaniol AC, Poron F, Authier FJ, Dreyfus PA, Gherardi RK.  
651       Satellite cells attract monocytes and use macrophages as a support to escape apoptosis and enhance muscle  
652       growth. *J Cell Biol.* 2003. 163:1133-43.

- 653 Chazaud B. Inflammation during skeletal muscle regeneration and tissue remodeling: application to exercise-  
654 induced muscle damage management. *Immunol Cell Biol.* 2016. 94(2):140-5.
- 655 Cheng, M., Nguyen, M., Fantuzzi, G., Koh, T. Endogenous interferon- $\gamma$  is required for efficient skeletal  
656 muscle regeneration. *Am. J. Physiol. Cell. Physiol.* 2008. 294(5):C1183-C1191.
- 657 Ciciliot, S., Shiaffino, S. Regeneration of mammalian skeletal muscle: basic mechanisms and clinical  
658 implications. *Curr. Pharm. Des.* 2010. 16(8):906-914.
- 659 De Filippo, K., Henderson, R., Laschinger, M., Hogg, N. Neutrophil chemokines KC and macrophage-  
660 inflammatory protein-2 are newly synthesized by tissue macrophages using distinct TLR signaling  
661 pathways. *J. Immunol.* 2008. 180(6):4308-4315.
- 662 Deshmane, S., Kremlev, S., Amini, S., Sawaya, B. Monocyte chemoattractant protein-1 (MCP-1): an  
663 overview. *J. Interferon Cytokine Res.* 2009. 29(6):313-326.
- 664 Flores-Díaz, M., Alape-Girón, A. Role of *Clostridium perfringens* phospholipase C in the pathogenesis of  
665 gas gangrene. *Toxicon.* 2003. 42(8):979-986.
- 666 Fu, X., Wang, H., Hu, P. Stem cell activation in skeletal muscle regeneration. *Cell. Mol. Life Sci.* 2015.  
667 72(9):1663-1677.
- 668 Gutiérrez, J.M, Ownby, C.L., Odell, G.V. Skeletal muscle regeneration after myonecrosis induced by crude  
669 venom and a myotoxin from the snake *Bothrops asper* (Fer-de-Lance). *Toxicon.* 1984. 22(5):719–731.
- 670 Gutiérrez J.M., Escalante T, Hernández R, Gastaldello S, Saravia-Otten P, Rucavado A. Why is Skeletal  
671 Muscle Regeneration Impaired after Myonecrosis Induced by Viperid Snake Venoms? *Toxins* 2018.  
672 10(5). pii: E182.
- 673 Hernández, R., Cabalceta, C., Saravia-Otten, P., Chaves, A., Gutiérrez, J.M., Rucavado, A. Poor regenerative  
674 outcome after skeletal muscle necrosis induced by *Bothrops asper* venom: Alterations in microvasculature  
675 and nerves. *PLoS ONE.* 2011. 6(5): e19834.
- 676 Juban G , and Chazaud B Metabolic regulation of macrophages during tissue repair: insights from  
677 skeletal musculeregeneration. *FEBS Lett.* 2017. 591(19):3007-3021.

- 678 Kalthovde JM, Jerkovic R, Sefland I, Cordonnier C, Calabria E, Schiaffino S, Lømo T. "Fast" and "slow"  
679 muscle fibres in hindlimb muscles of adult rats regenerate from intrinsically different satellite cells. J  
680 Physiol. 2005. 562:847-57.
- 681 Karalaki, M., Fili, S., Philippou, A., Koutsilieris, M. Muscle regeneration: cellular and molecular events. In  
682 vivo. 2009. 23(5):779-796.
- 683 Kotwal, G.J. and Chien S. Macrophage Differentiation in Normal and Accelerated Wound Healing. In:  
684 macrophages: Origin, Functions and Biointervention. 2017. Malgorzata\_Kloc Editor . Springer. pp 353-  
685 364 ISSN 0080-1844.
- 686 Livak KJ, Schmittgen TD. 2001. Analysis of relative gene expression data using real-time quantitative PCR  
687 and the  $2^{-\Delta\Delta C(T)}$  method. Methods 25:402–8.
- 688 Mahbub S, Deburghgraeve CR, Kovacs EJ. 2012. Advanced age impairs macrophage polarization. J  
689 Interferon Cytokine Res. 32(1):18-26.
- 690 Mantovani, A., Sica, A., Sozzani, S., Allavena, P., Vecchi, A., Locati, M. The chemokine system in diverse  
691 forms of macrophage activation and polarization. Trends. Immunol. 2004. 25(12):677–686.
- 692 Monturiol-Gross L, Flores-Díaz M, Araya-Castillo C, Pineda-Padilla MJ, Clark GC, Titball RW, Alape-  
693 Girón A. Reactive oxygen species and the MEK/ERK pathway are involved in the toxicity of *Clostridium*  
694 *perfringens*  $\alpha$ -toxin, a prototype bacterial phospholipase C. J Infect Dis. 2012. 206:1218-26.
- 695 Novak ML, Koh TJ. Phenotypic transitions of macrophages orchestrate tissue repair. Am J Pathol. 2013,  
696 183(5):1352-1363.
- 697 O'Brien, D., Therit, B., Woodman, M., Melville, S. The role of neutrophils and monocytic cells in controlling  
698 the initiation of *Clostridium perfringens* gas gangrene. FEMS Immunol. Med. Microbiol. 2007. 50(1):86-  
699 93.
- 700 Olefsky JM, Glass CK. Macrophages, inflammation, and insulin resistance. Annu Rev Physiol. 2010. 72:219-  
701 46.

- 702 Piller NI, Decosterd I, Suter MR. Reverse transcription quantitative real-time polymerase chain reaction  
703 reference genes in the spared nerve injury model of neuropathic pain: validation and literature search.  
704 BMC Res Notes. 2013. 10;6:266.
- 705 Rigamonti, E., Touvier, T., Clementi, E., Manfredi, A., Bruneli, S., Rovere-Querini, P. Requirement of  
706 inducible nitric oxide synthase for skeletal muscle regeneration after acute damage. J. Immunol. 2013.  
707 190(4): 1767–1777.
- 708 Serrano, A., Muñoz-Cánoves, P. Regulation and dysregulation of fibrosis in skeletal muscle. Exp. Cell Res.  
709 2010. 316(18):3050-3058.
- 710 Stevens D.L, Bryant A.E. Necrotizing Soft-Tissue Infections. N Engl J Med. 2017. 377:2253-2265.
- 711 Takehara, M., Takagishi, T., Seike, S., Ohtani, K., Kobayashi, K., Miyamoto, K., Shimizu, T., Nagahama,  
712 M. *Clostridium perfringens*  $\alpha$ -Toxin impairs innate immunity via inhibition of neutrophil differentiation.  
713 Sci. Rep. 2016. 6:28192.
- 714 Tidball, J. Inflammation in skeletal muscle regeneration. En: Skeletal muscle repair and regeneration. 2008.  
715 Schiaffino, S. and Partridge, T. Editors. Vol. 3. 385 p.
- 716 Tidball, J., Villalta, A. Regulatory interactions between muscle and the immune system during muscle  
717 regeneration. Am. J. Physiol. Regul. Integr. Comp. Physiol. 2010. 298(5): R1173–R1187.
- 718 Tidball, J. Mechanisms of muscle injury, repair, and regeneration. Compr. Physiol. 2011. 1(4):2029-2062.
- 719 Tidball, J. Regulation of muscle growth and regeneration by the immune system. Nat. Rev. Immunol. 2017.  
720 17(3):165-177.
- 721 Turner, N., Badylak, S. Regeneration of skeletal muscle. Cell Tissue Res. 2012. 347(3):759-774.
- 722 Villalta SA, Nguyen HX, Deng B, Gotoh T, Tidball JG. Shifts in macrophage phenotypes and macrophage  
723 competition for arginine metabolism affect the severity of muscle pathology in muscular dystrophy. Hum  
724 Mol Genet. 2009. 18(3):482-96.
- 725 Villalta, A., Rinaldi, C., Deng, B., Liu, G., Ferdor, B., Tidball, J. Interleukin-10 reduces the pathology of  
726 mdx muscular dystrophy by deactivating M1 macrophages and modulating macrophage phenotype. Hum.  
727 Mol. Genet. 2011a. 20(4):790-805.

- 728 Villalta, A., Deng, B., Rinaldi, C., Wehling-Henricks, M., Tidball, J. IFN- $\gamma$  promotes muscle damage in the  
729 mdx mouse model of Duchenne muscular dystrophy by suppressing M2 macrophage activation and  
730 inhibiting muscle cell proliferation. *J. Immunol.* 2011b. 187(10):5419-5428.
- 731 Wynn, T.A. Cellular and molecular mechanisms of fibrosis. *J. Pathol.* 2008. 214(2): 199-210.
- 732 Xiao W, Liu Y, Chen P. Macrophage Depletion Impairs Skeletal Muscle Regeneration: the Roles of Pro-  
733 fibrotic Factors, Inflammation, and Oxidative Stress. *Inflammation.* 2016. 39(6):2016-2028.
- 734 Yoshimura A, Wakabayashi Y, Mori T. Cellular and molecular basis for the regulation of inflammation by  
735 TGF-beta. *J Biochem.* 2010. 147(6):781-92.
- 736 Zhao, W., Lu, H., Wang, X., Ransohoff, R. M., Zhou, L. CX3CR1 deficiency delays acute skeletal muscle  
737 injury repair by impairing macrophage functions. *FASEB J.* 2016. 30:380–393.

738 **Figure legends**

739 **Figure 1. Myonecrosis induced by infection with a sublethal inoculum of *C. perfringens*.** Groups of 6  
740 CD-1 mice were injected intramuscularly with  $1 \times 10^6$  CFU of *C. perfringens*. (A) CK activity was determined  
741 in plasma 5 and 24 h after infection. Results show mean  $\pm$  SE. \* $p < 0.01$  for samples that differ statistically  
742 from control. (B) Sections of the injected muscles were taken 5 h, 1 d and 3 d after infection, and stained with  
743 Hematoxylin-Eosin (HE). Abundant necrotic muscle cells are observed as early as 5 h after infection. Bacteria  
744 and inflammatory infiltrate are evident in the necrotic muscle (arrows and asterisks, respectively). Notice the  
745 presence of bacteria near a necrotic cell 3 d after infection (patch). Control muscle injected with PBS show a  
746 normal histological pattern. Bar scale, 100  $\mu$ m.

747  
748 **Figure 2. Alterations in muscle regeneration after an experimental infection with a sublethal inoculum**  
749 **of *C. perfringens*.** Groups of 3 CD-1 mice were injected intramuscularly with  $1 \times 10^6$  CFU of *C. perfringens*  
750 and muscle sections from samples collected at 7, 14, and 30 d were stained with HE. Patch at 7 d shows  
751 regenerative cells with central nuclei; asterisks indicate the presence of cellular debris embedded in a fibrous  
752 matrix at different times. Bar scale, 100  $\mu$ m.

753  
754 **Figure 3. Muscle regeneration efficiency and regenerating fibers size after an experimental infection**  
755 **with a sublethal inoculum of *C. perfringens*.** Groups of 3 CD-1 mice were injected intramuscularly with  
756  $1 \times 10^6$  CFU of *C. perfringens*, and muscle sections from samples collected at 1, 14, and 30 d were stained  
757 with HE. (A) The extent of myonecrosis was determined one d post infection as the percentage of the  
758 examined area corresponding to necrotic fibers; the percentage of the necrotic area at 14 and 30 d corresponds  
759 to non-regenerated muscle including cellular debris and fibrotic zones, while the percentage of the  
760 regenerated area was determined 14 and 30 d post infection as the area encompassing regenerative fibers. (B)  
761 Quantification of the regenerative fibers according to their diameter 30 d post infection and comparison with  
762 controls injected with sterile PBS. Results show the means  $\pm$  SE.

763



764 **Figure 4. Collagen deposition in mice gastrocnemius after an experimental infection with a sublethal**  
765 **inoculum of *C. perfringens*.** Groups of 3 CD-1 mice were injected intramuscularly with  $1 \times 10^6$  CFU of *C.*  
766 *perfringens*. (A) Sections from muscle samples collected at 7, 14 and 30 d after injection were stained with  
767 Sirius Red and Fast Green; red areas correspond to collagen fibers, while green areas correspond to other  
768 proteins. Controls were injected with sterile PBS. Bar scale, 100  $\mu$ m. (B) The fibrotic muscle was quantified  
769 at 30 d as the percentage of the examined area corresponding to collagen. Results show the means  $\pm$  SE.  
770 \* $p < 0.05$  for samples with a statistically significant difference when compared with the control.

771

772 **Figure 5. Capillary vessels in gastrocnemius after an experimental infection with a sublethal inoculum**  
773 **of *C. perfringens*.** Groups of 3 CD-1 mice were injected intramuscularly with  $6 \times 10^6$  CFU of *C. perfringens*.  
774 (A) Sections from muscle samples collected at 6 h, 1, and 30 d after injection were stained with anti-Flk-1  
775 antibodies by immunofluorescence. Arrow heads indicate the lack of capillaries at 6 h and 1 d post infection,  
776 while arrows point the presence of capillaries in fibrotic areas at 30 d post infection. Bar scale, 100  $\mu$ m. The  
777 number of capillaries per area (B) and per muscle fiber (C) were determined at different times after infection.  
778 Controls were injected with sterile PBS. Results show the means  $\pm$  SE. \* $p < 0.05$  for samples with a  
779 statistically significant difference when compared with the control.

780

781 **Figure 6. Innervation in mouse gastrocnemius after an experimental infection with a sublethal**  
782 **inoculum of *C. perfringens*.** Groups of 3 CD-1 mice were injected intramuscularly with  $6 \times 10^6$  CFU of *C.*  
783 *perfringens*. (A) Sections from muscle samples collected at 3 and 30 d were stained with anti-heavy  
784 neurofilament protein antibodies by immunofluorescence. Arrow indicates nerve alterations 3 d post  
785 infection. Bar scale, 100  $\mu$ m. The number of nerves per area (B) and the number of axons inside nerves (C)  
786 were determined at different times after infection. Controls were injected with sterile PBS. Results show the  
787 means  $\pm$  SE. \* $p < 0.05$  for samples with a statistically significant difference when compared with the control.

788

789 **Figure 7. Cytokines expression in mouse gastrocnemius after an experimental infection with a sublethal**  
790 **inoculum of *C. perfringens*.** Groups of 4 CD-1 mice were injected intramuscularly with  $1 \times 10^6$  CFU of *C.*  
791 *perfringens* and the expression of cytokines in the infected muscles was measured by RT-PCR (A) and by  
792 ELISAs (B) at different times. The results obtained with three normalization genes (GADPH, RPL13A,  
793 RNSP1) were incorporated in (A), based on  $2^{-\Delta\Delta C_t}$  calculation. Controls were injected with sterile PBS.  
794 Results show the mean  $\pm$  SE. \* $<0.01$ ; \*\* $p<0.05$  for samples with a statistically significant difference when  
795 compared with controls.

796  
797 **Figure 8. Chemoattractants expression in mouse gastrocnemius after an experimental infection with a**  
798 **sublethal inoculum of *C. perfringens*.** Groups of 4 CD-1 mice were injected intramuscularly with  $1 \times 10^6$   
799 CFU of *C. perfringens* and the expression of chemoattractants in the infected muscles was measured by RT-  
800 PCR at different times. The results obtained with three normalization genes (GADPH, RPL13A, RNSP1)  
801 were incorporated, based on  $2^{-\Delta\Delta C_t}$  calculation. Controls were injected with sterile PBS. Results show the  
802 mean  $\pm$  SE. \* $<0.01$ ; \*\* $p<0.05$  for samples with a statistically significant difference when compared with  
803 controls.

804  
805 **Figure 9. TGF $\beta$ 1 expression in mouse gastrocnemius after an experimental infection with a sublethal**  
806 **inoculum of *C. perfringens*.** Groups of 4-6 CD-1 mice were injected intramuscularly with  $6 \times 10^6$  CFU of *C.*  
807 *perfringens* and the expression of TGF $\beta$ 1 in the infected muscles was measured by RT-PCR (A) and by  
808 ELISA (B), at different times. Controls were injected with sterile PBS. Results show the means  $\pm$  SE.  
809 \* $p<0.01$ ; \*\* $p<0.05$  for samples with a statistically significant difference when compared with the control.

810  
811 **Figure 10. Recruitment of PMN at the site of injury after an experimental infection with a sublethal**  
812 **inoculum of *C. perfringens*.** Groups of 3 CD-1 mice were injected intramuscularly with  $1 \times 10^6$  CFU of *C.*  
813 *perfringens* and the presence of PMN was determined using anti-elastase antibodies at the indicated times  
814 (A). For each time, the number of cells corresponding to PMN was determined (B). Bar scale, 50  $\mu$ m.

815

816 **Figure 11. Recruitment of M1 and M2 macrophages at the site of the injury after an experimental**  
817 **infection with a sublethal inoculum of *C. perfringens*.** Groups of 3 CD-1 mice were injected  
818 intramuscularly with  $1 \times 10^6$  CFU of *C. perfringens* and the presence of M1 and M2 macrophages was  
819 determined using anti-iNOS and anti-arginase antibodies, respectively, at the indicated times. The highest  
820 intensity observed was related to the maximum number of cells in the muscle (**A**). For each time, the number  
821 of cells corresponding to M1 and M1 macrophages was determined (**B**). Bar scale, 50  $\mu$ m.

822

823 **Figure 12. Time course of changes in cytokines expression and intramuscular myeloid cell populations**  
824 **after acute muscle injury, compared with those after an experimental infection with a sublethal**  
825 **inoculum of *C. perfringens*.** (A) Expected cytokines expression and changes of myeloid cell populations  
826 after acute muscle injury (Tidball and Villalta, 2010; Tidball, 2017). (B) Cytokines expression and changes  
827 of myeloid cell populations after an intramuscular infection with a sublethal inoculum of *C. perfringens*.  
828 PMN, neutrophils; M1, M1 macrophages; M2, M2 macrophages.

829

830 **Table 1.** Primers used to assess the expression levels of inflammatory response.

831

| <b>Gen</b>                    |     | <b>Sequence (5'-3')</b>    | <b>Amplicon size (pb)</b> | <b>Reference</b>               |
|-------------------------------|-----|----------------------------|---------------------------|--------------------------------|
| <b>MIP2</b>                   | Fwd | AGGGCGGTCAAAAAGTTTGC       | 194                       | Palomo <i>et al.</i> , 2016    |
|                               | Rev | CGAGGCACATCAGGTACGAT       |                           |                                |
| <b>KC</b>                     | Fwd | GCTGGGATTCACCTCAAGAA       | 180                       | Lee <i>et al.</i> , 2015       |
|                               | Rev | TCTCCGTTACTTGGGGACAC       |                           |                                |
| <b>MCP-1</b>                  | Fwd | ATGCAGTTAATGCCCACTC        | 167                       | Thacker <i>et al.</i> , 2009   |
|                               | Rev | TTCCTTATTGGGGTCAGCAC       |                           |                                |
| <b>IL6</b>                    | Fwd | GAACAACGATGATGCACTTGC      | 154                       | Villalta <i>et al.</i> , 2011b |
|                               | Rev | CTTCATGTACTCCAGGTAGCTATGGT |                           |                                |
| <b>IL10</b>                   | Fwd | CAAGGAGCATTTGAATTCCC       | 157                       | Villalta <i>et al.</i> , 2011a |
|                               | Rev | GGCCTTGTAGACACCTTGGTC      |                           |                                |
| <b>TNF<math>\alpha</math></b> | Fwd | CTTCTGTCTACTGAACTTCGGG     | 163                       | Villalta <i>et al.</i> , 2011b |
|                               | Rev | CACTTGGTGGTTTGTCTACGAC     |                           |                                |
| <b>IFN<math>\gamma</math></b> | Fwd | TGCTGATGGGAGGAGATGTCT      | 101                       | Han <i>et al.</i> , 2012       |
|                               | Rev | TTTCTTTCAGGGACAGCCTGTT     |                           |                                |
| <b>IL1<math>\beta</math></b>  | Fwd | TGACGTTCCCATTAGACAACCTG    | 231                       | Cheng <i>et al.</i> , 2008     |
|                               | Rev | CCGTCTTTCATTACACAGGACA     |                           |                                |
| <b>TGF<math>\beta</math>1</b> | Fwd | GAGACGGAATACAGGGCTTTC      | 240                       | Arnold <i>et al.</i> , 2007    |
|                               | Rev | TCTCTGTGGAGCTGAAGCAAT      |                           |                                |
| <b>IL13</b>                   | Fwd | TCTTGCTTGCCTTGGTGGTCTCGC   | 220                       | Barbara <i>et al.</i> , 2001   |
|                               | Rev | GATGGCATTGCAATTGGAGATGTTG  |                           |                                |
| <b>*GAPDH</b>                 | Fwd | AACCTGCCAAGTATGATGAC       | 191                       | Sachdev <i>et al.</i> , 2014   |
|                               | Rev | ATACCAGGAAATGAGCTTGA       |                           |                                |
| <b>*RPL13A</b>                | Fwd | CCTGCTGCTCTCAAGGTTGTT      | 146                       | Villalta <i>et al.</i> , 2011a |
|                               | Rev | CGATAGTGCATCTTGGCCTTT      |                           |                                |
| <b>*RNSP1</b>                 | Fwd | AGGCTCACCAGGAATGTGAC       | 196                       | Villalta <i>et al.</i> , 2011a |
|                               | Rev | CTTGGCCATCAATTTGTCCT       |                           |                                |

832

833 **\*Reference genes used for data normalization**

834

Figure 1

835

836

A

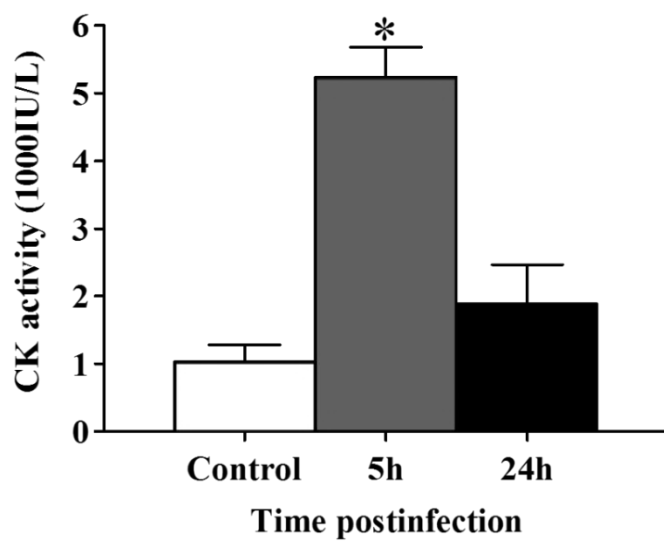

B

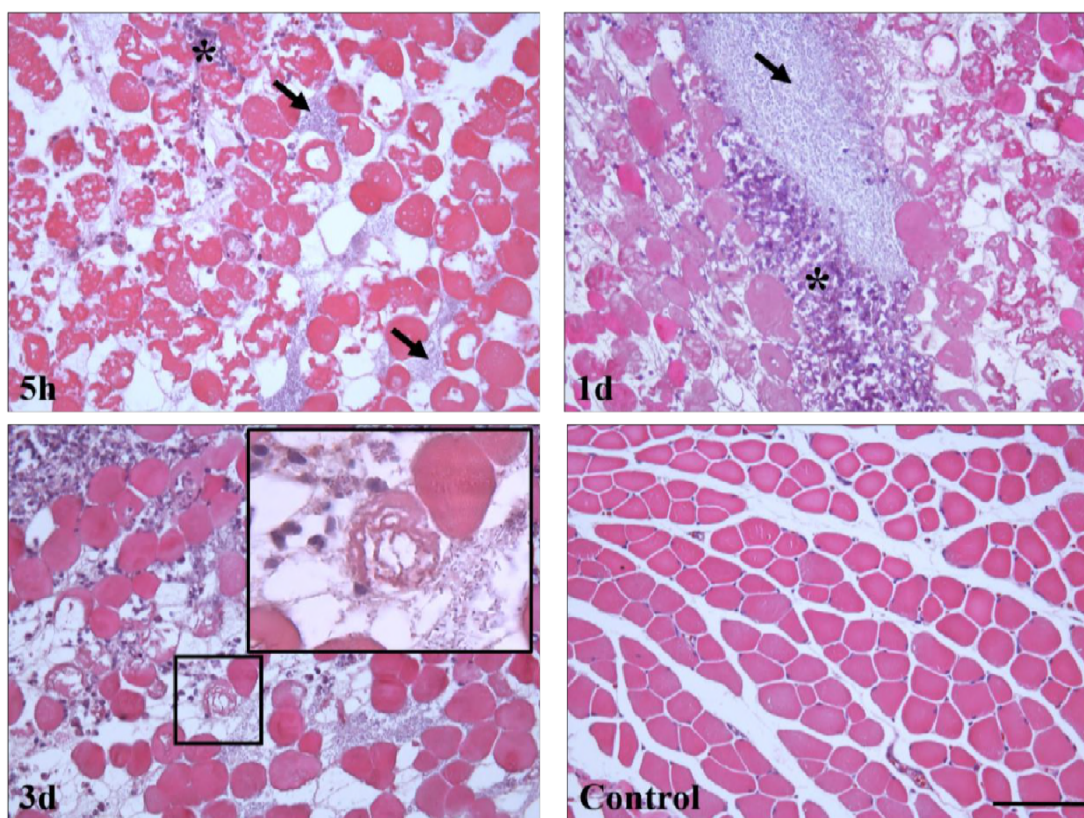

837

838

839

840

**Figure 2**

841

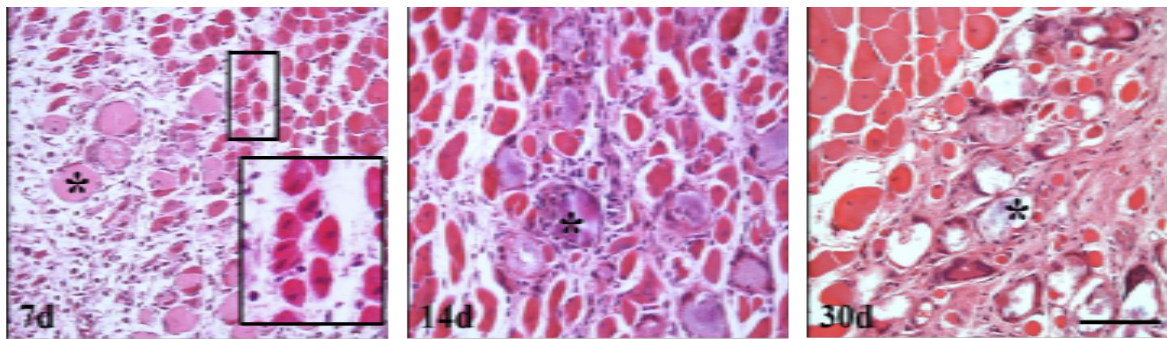

842

843

844



845

Figure 3

A

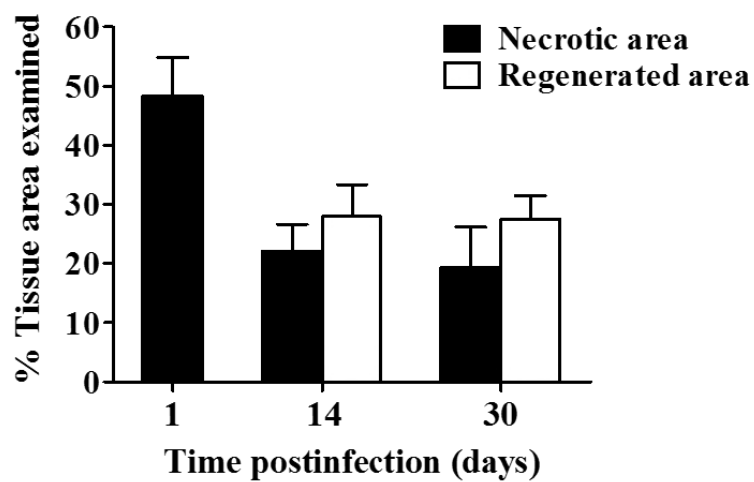

B

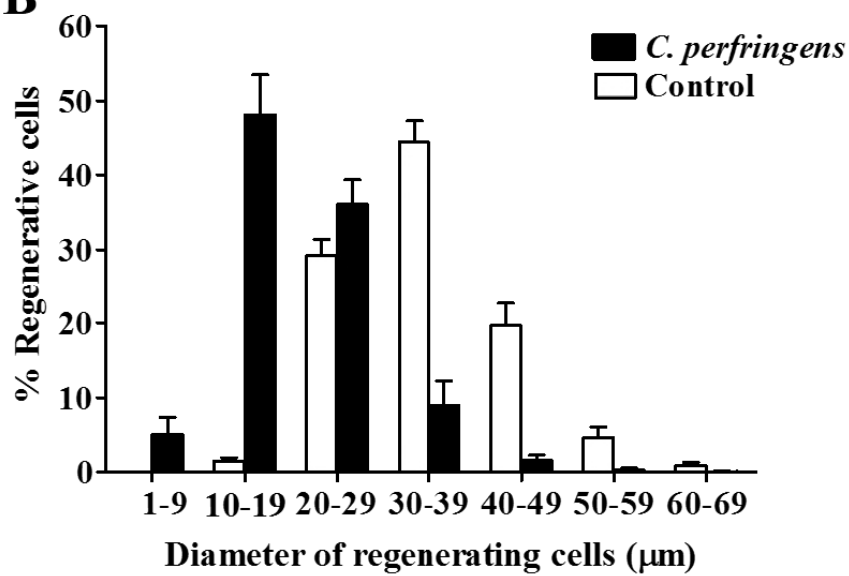

846

847

848

849

850

851

Figure 4

A

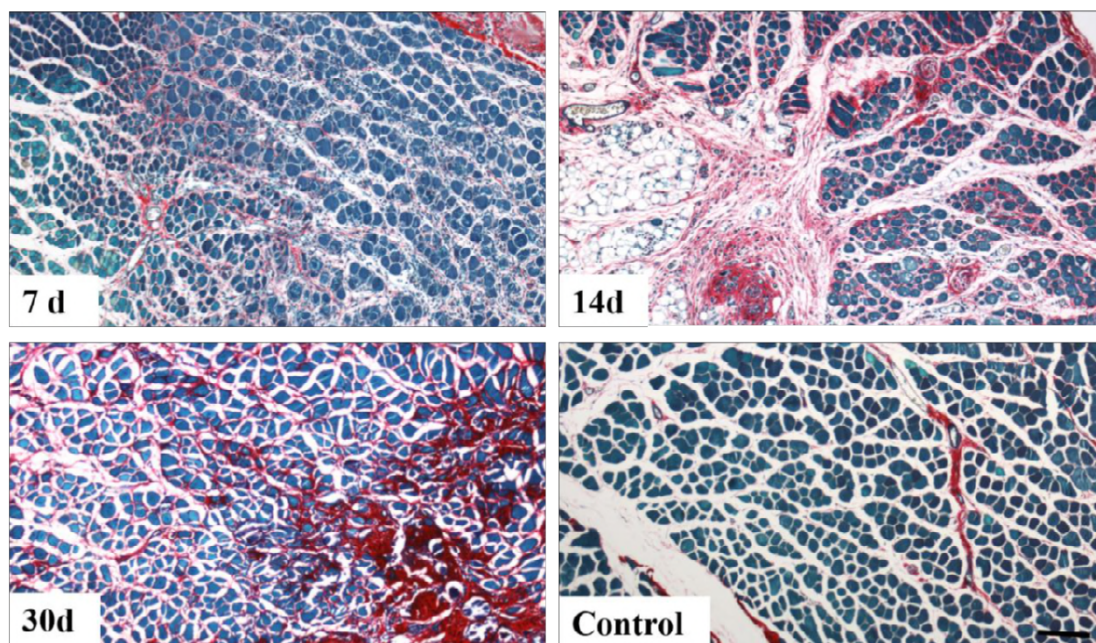

B

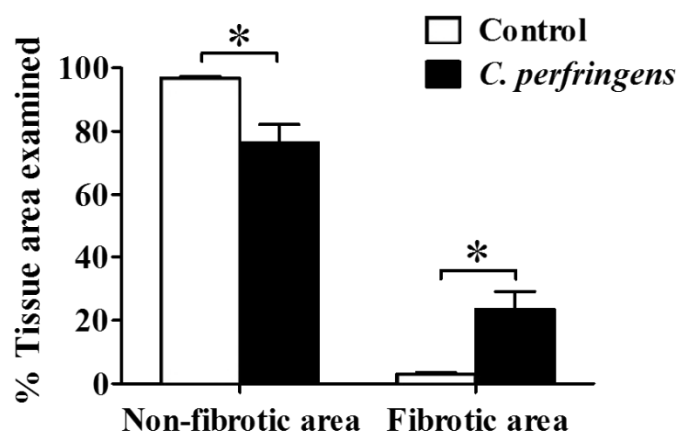

852

853



Figure 5

854

855

856

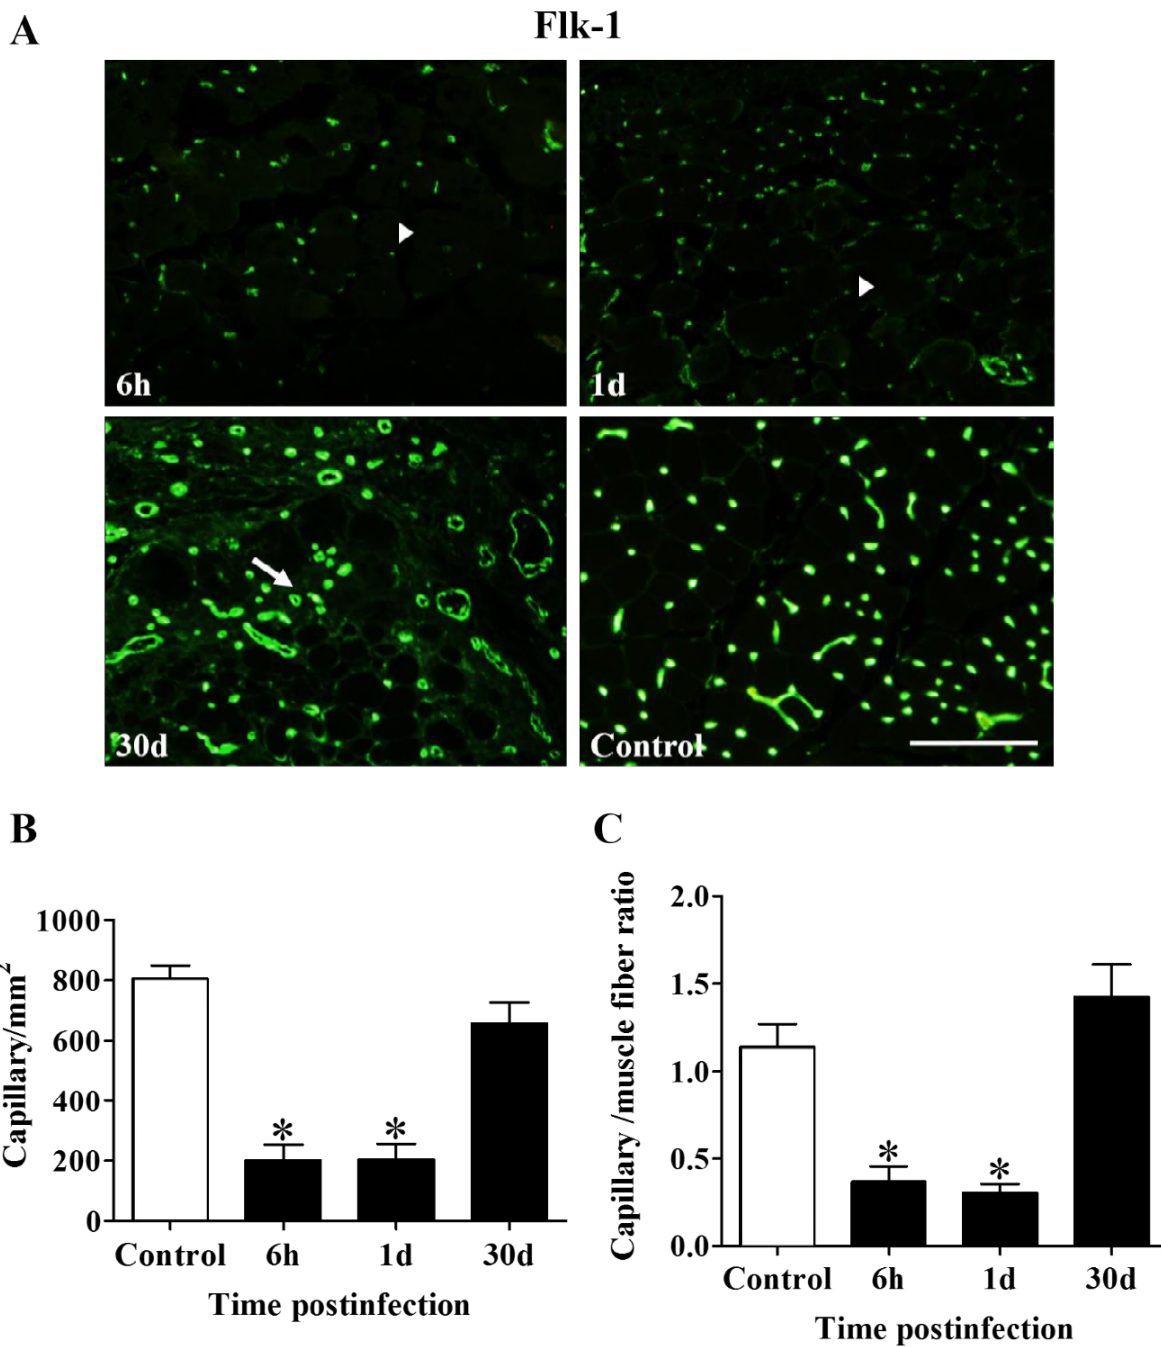

857

858

859

Figure 6

860

861

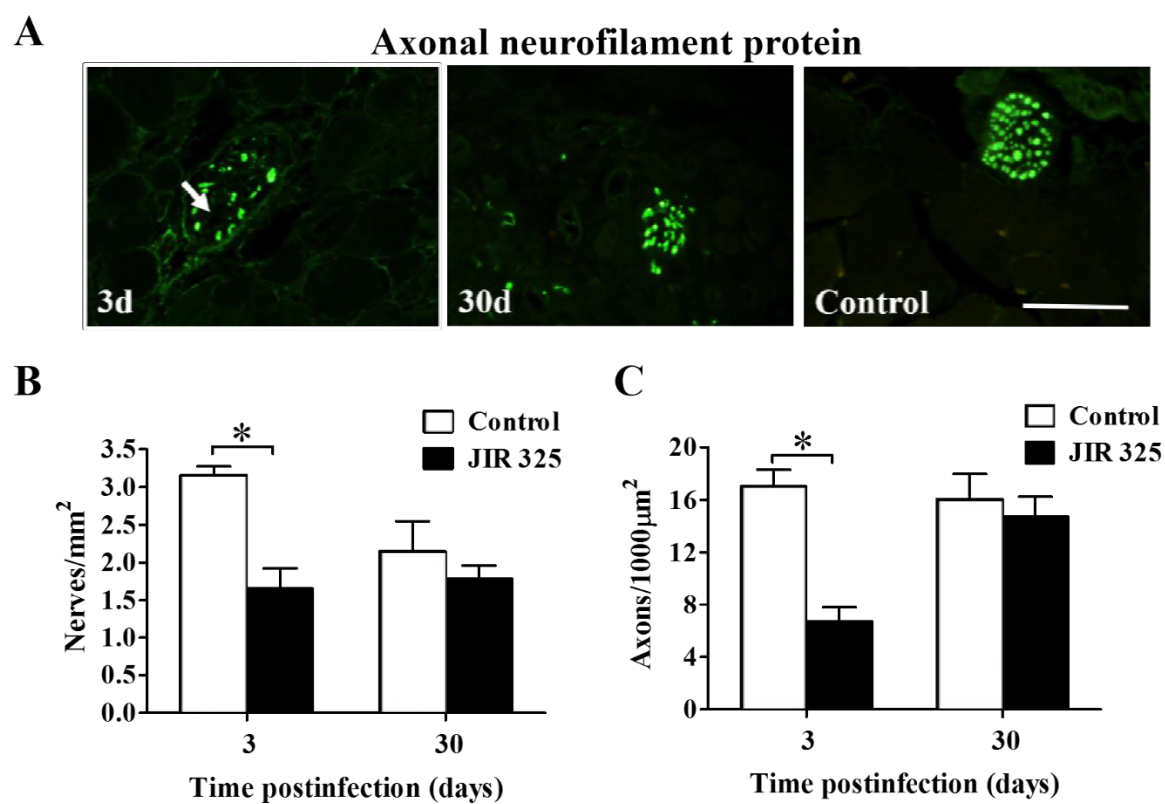

862

Figure 7

863

864

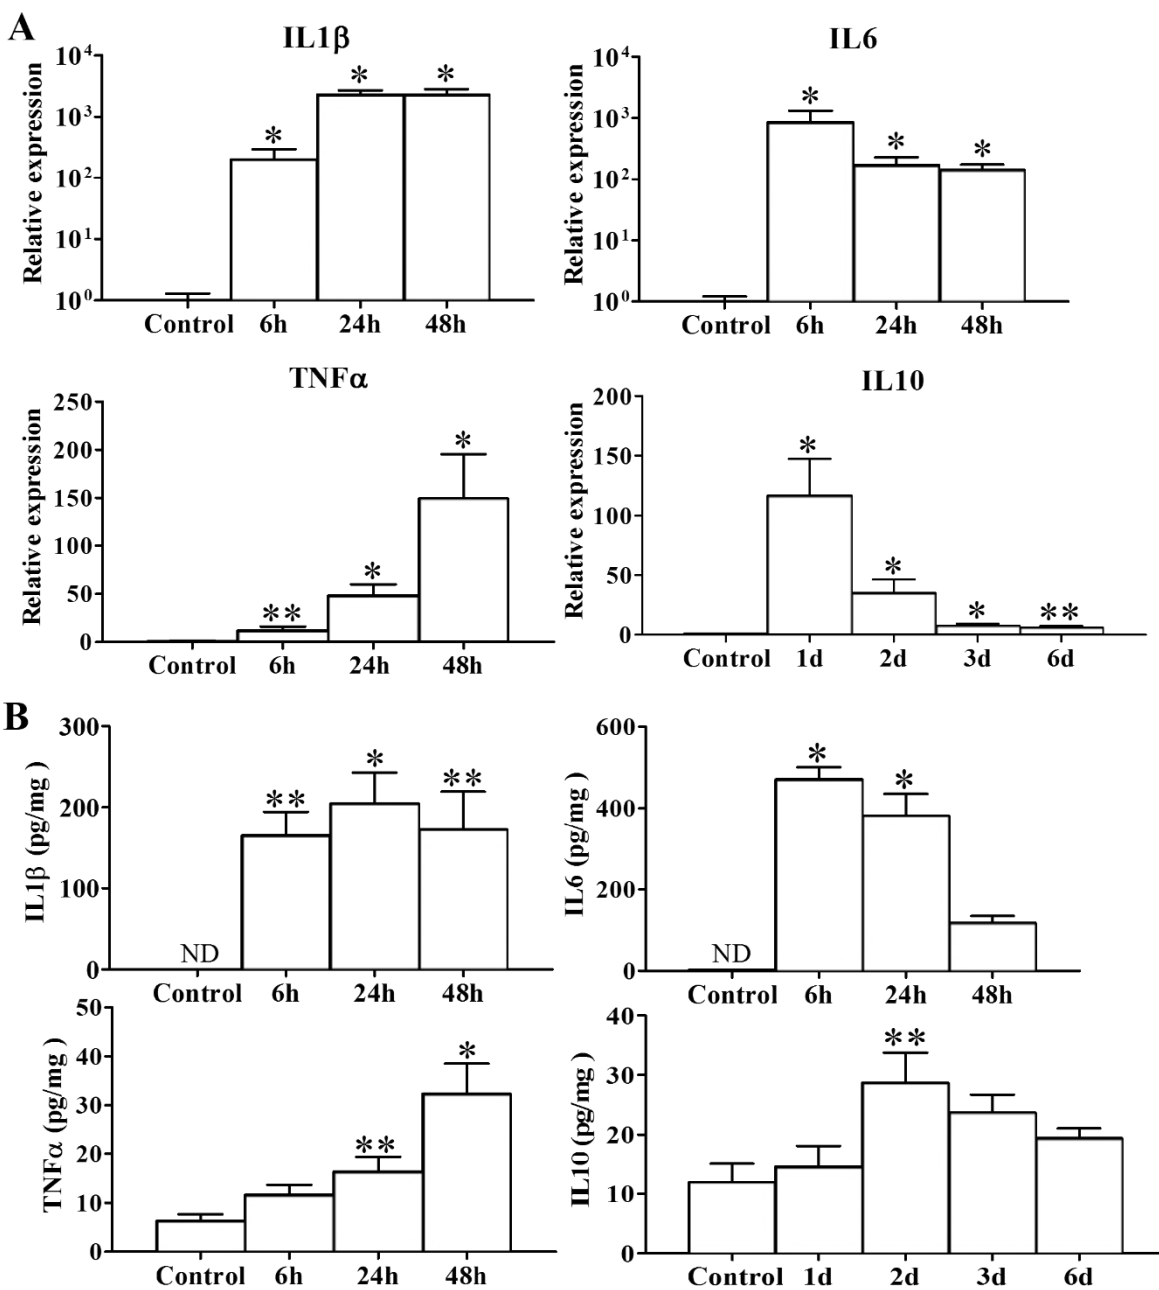

865

Figure 8

866

867

868

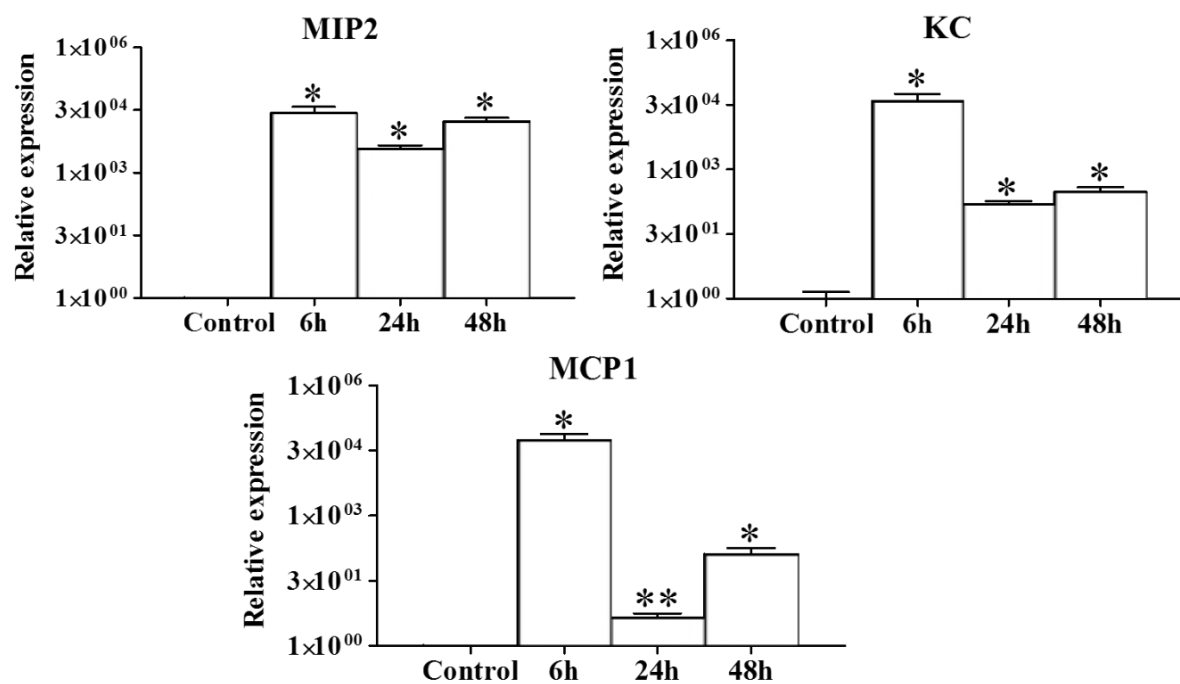

869

870

871

872

873

Figure 9

874

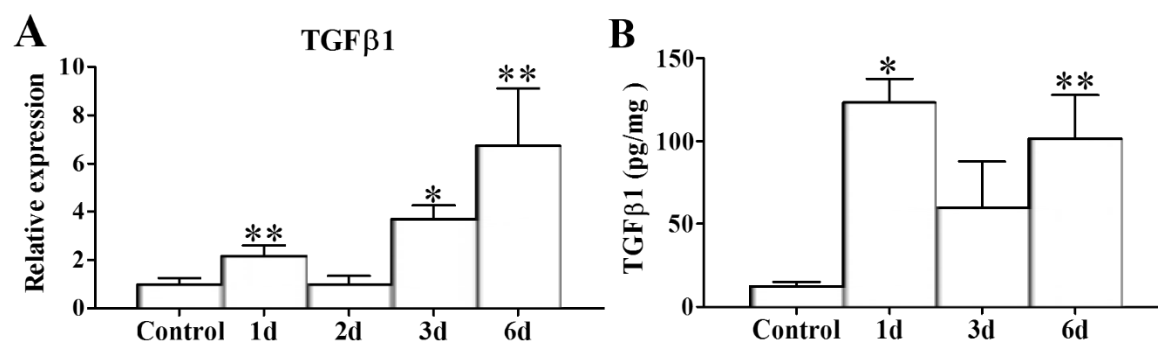

875

876

877

Figure 10

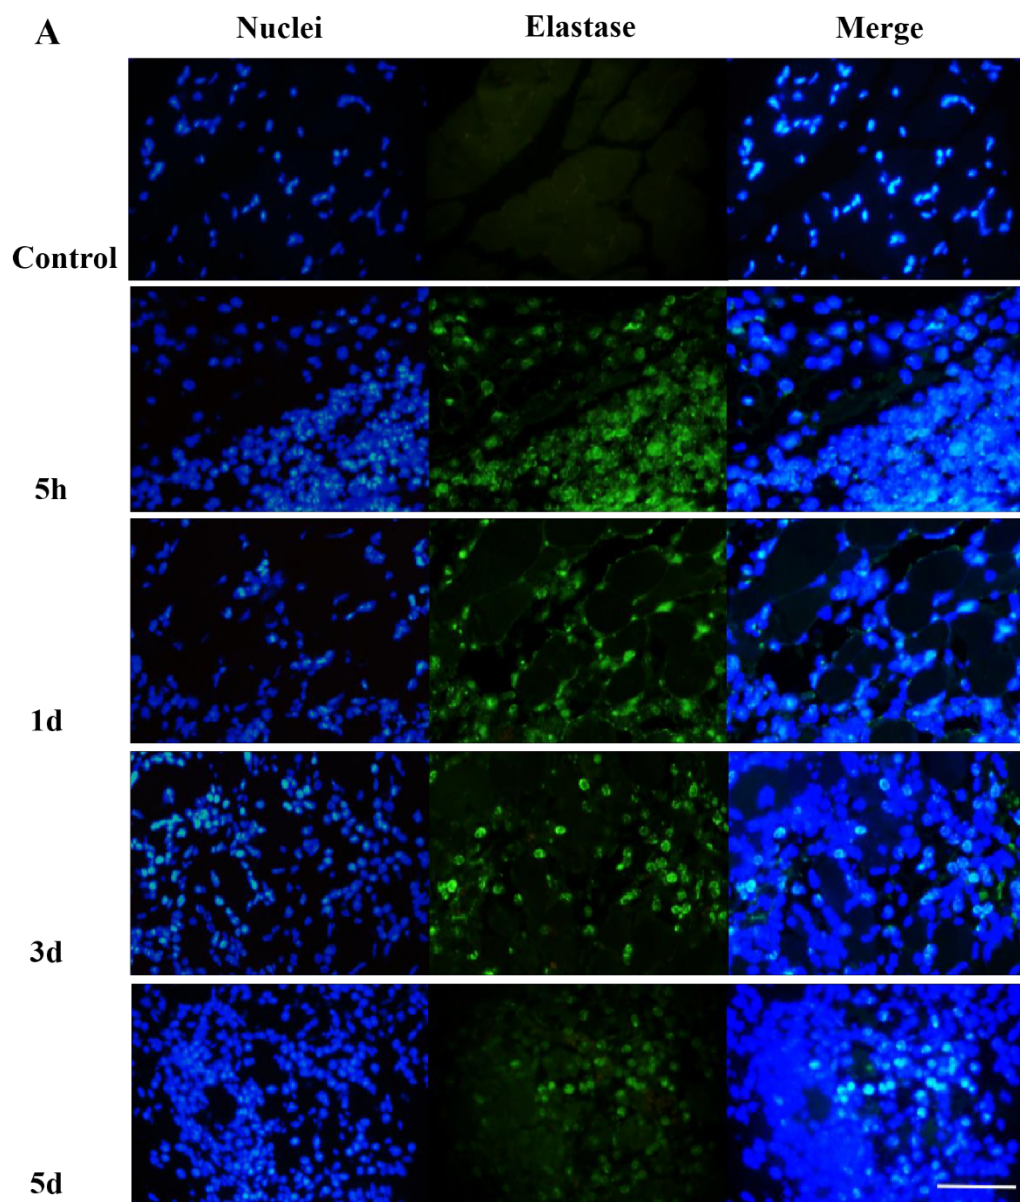

**B**

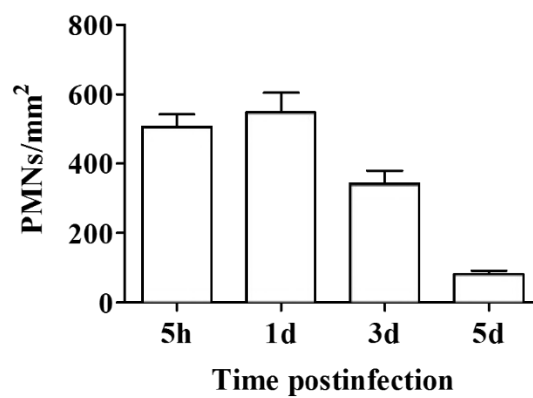

878

879

880

Figure 11

881

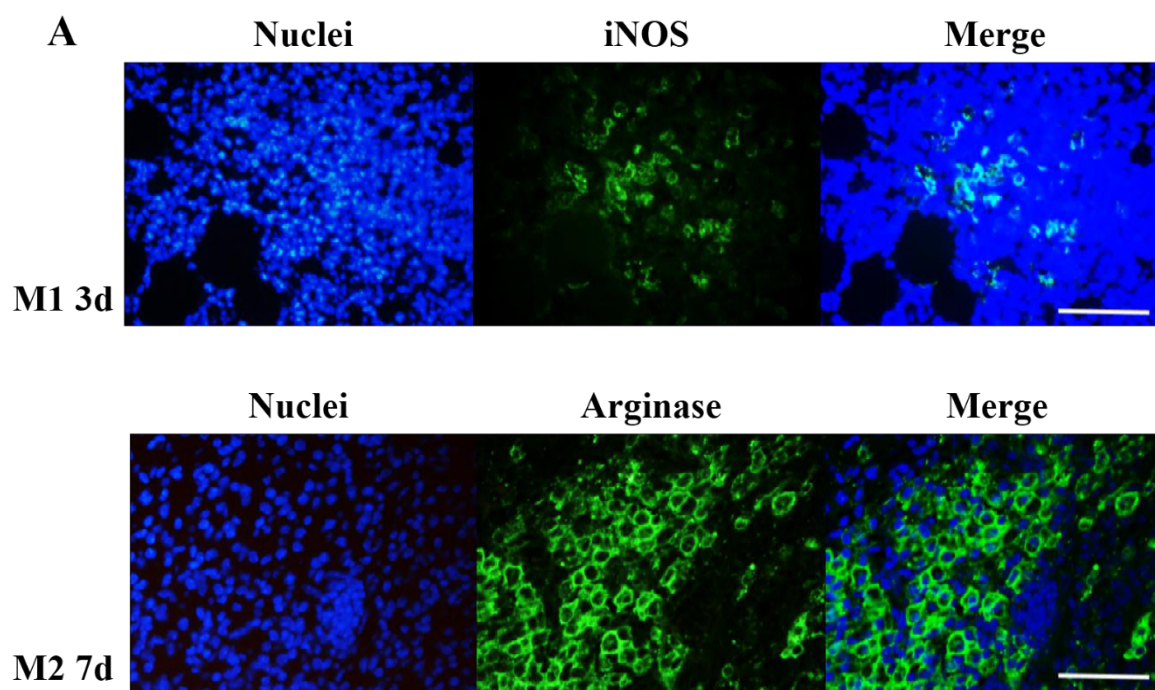

**B**

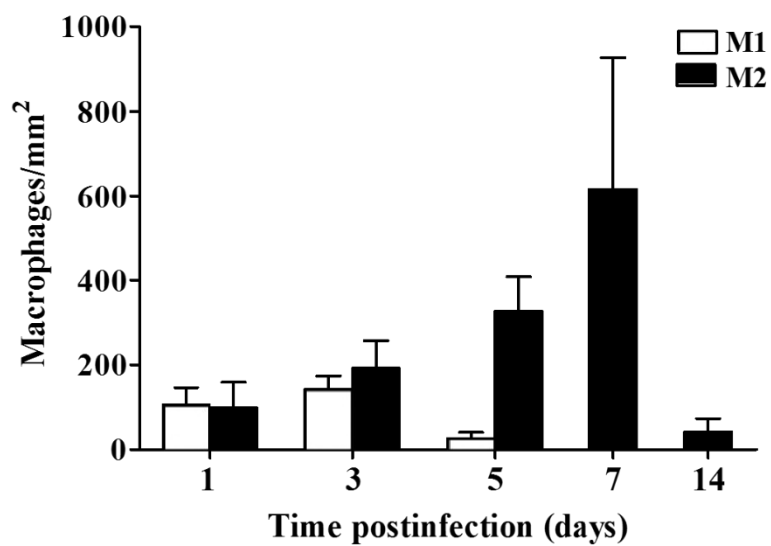

882

883

884

885



886

Figure 12

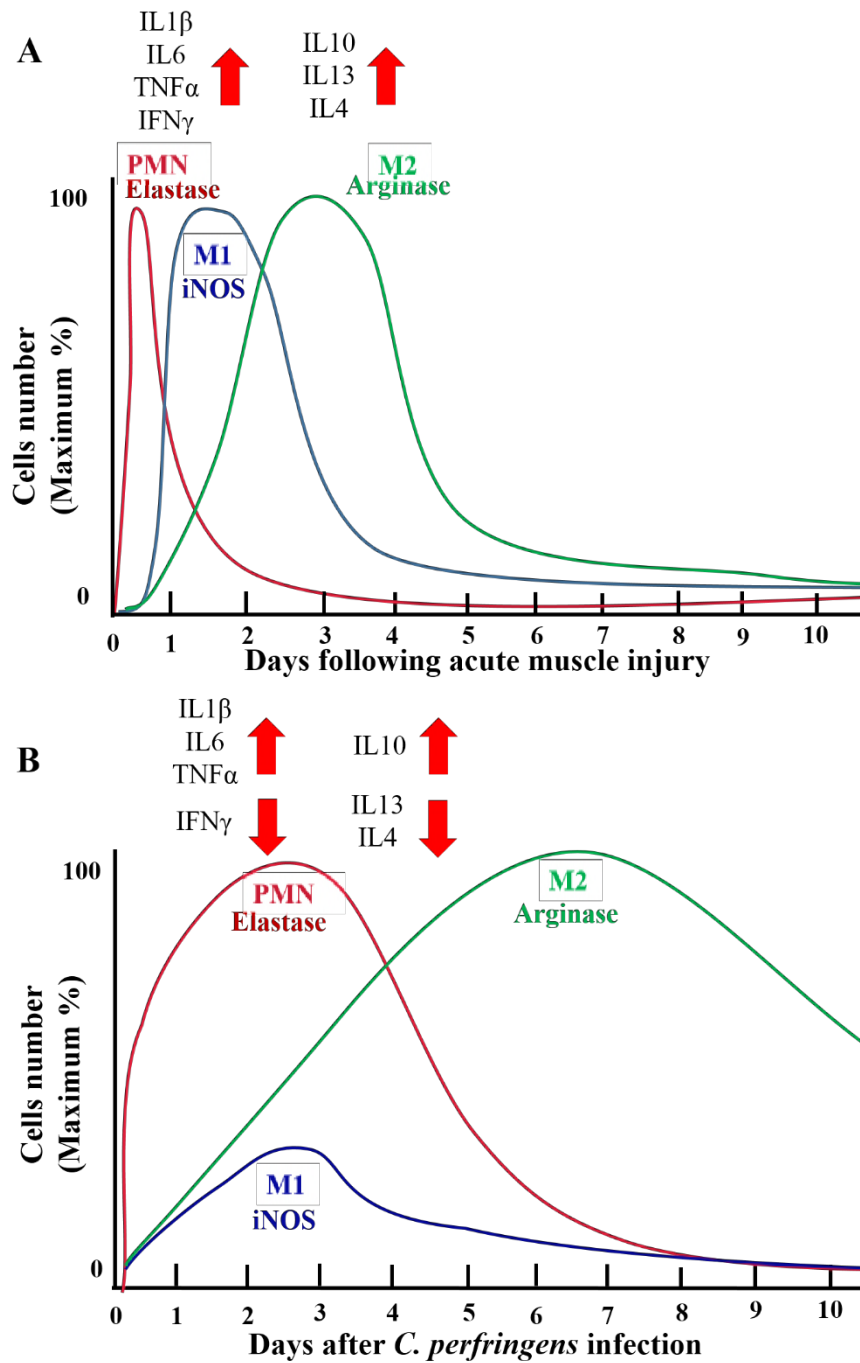

887

888

889

890
